# Supplementary material for: Genome-wide identification, molecular characterization, and gene expression analyses of honeysuckle NHX antiporters suggest their involvement in salt stress adaptation
Source: PeerJ. 2022 Apr 19;10:e13214. doi: 10.7717/peerj.13214 (PMC9029436; doi:10.7717/peerj.13214)
Supplement: Supplemental Information 1 [file peerj-10-13214-s001.xlsx]

## Sheet: Sheet1
>LjNHX1
MGFSFGSVFSTTGLLSSDSDQAFVNSVTLFVALLCACIVIGHLLEENRWMNESITALVIGLGTGIVILLTSGGTSSRILEFNEEFFFIYLLPPIIFNAGFQVKKKQFFRNFMTIMLFGAIGTLISFGIISFGATQLFKTLDVGFLELRDYLAIGAIFSATDSVCTLQVLNQEETPLLYSLVFGEGVVNDATSIVLFNAIQKFDLSQKKSGMALQFVGNFLSLFITSTLLGVAVGLLSAYIVKKLYFGRHSTDREVALMILMAYLSYVMAEASSLTLKHAFATLSFVAEVFIFLYVGMDALDIEKWNPGTSAGVSAILLGLVLVGRAAFVFPLSFVSNFAKKSKSDKIEFKQQVTIWWAGLMRGAVSIALAYNQFTKAGHTQQLGHAIMITSTITVVLFS…
>LjNHX2
MDTLSNSDHASVVSINLFVALLCACIVIGHLLEENRWMNESITALAIGLCTGFVILLTTGGTSSHLLVFSEDLFFIYLLPPIIFNAGFQVKKKQFFRNFMTITLFGAVGTLISFIIISLGAINIFKKMNIGSLEIADFLAIGAIFSATDSVCTLQVLNQDETPLLYSLVFGEGVVNDATSVVLFNAVQSFDLSHINASTCLQLVGNFLYLFVTSTLLGVVAGLLSAYIIKKLYFGRHSTDREVAIMMLMAYLSYMLAELFYLSAILTVFFCGIVMSHYTWHNVTESSRITTKHAFATLSFVAEIFIFLYVGMDALDIEKWKFISDSPGTSVGVSAILLGLVLVGRAAFVFPLSFLSNLTKRNSYDKIEFKQQITIWWAGLMRGAVSMALAYNQFTRLGH…
>LjNHX3
MAFHLISSIMTKLETLSTSDHASIVSMNLFVALLCTCIVIGHLLEENRWMNESITALLIGLFTGVVILLTSGGKSSHVLVFSEDLFFIYLLPPIIFNAGFQVKKKHFFRNFITIMLFGAVGTLISCVVISIGATEIFKKMDVGSLDVGDFLAIGAIFAATDSVCTLQVLNQDETPLLYSLVFGEGVVNDATSVVLFNAVQSFDISSISPSIALHFVGNFLYLFITSTMLGVITGLLSAYIIKTLYFGRHSTDREVALMMLMAYLSYMLAELFYLSGILTVFFCGIVMSHYTWHNVTESSRITTKHAFATLSFVAETFIFLYVGMDALDIEKWRFVSDSPGISVAVSSILLGLTLLGRAAFVFPLSFLSNLAKKTPQERISIRQQVIIWWAGLMRGAVSM…
>LjNHX4
MLLYHFPSAIGAILSATDSVCTLQVLNQEETPFLYSVVFGEGVVNDATSIVLFNAVQSLDVSNIDAFTALKLLWTFLYLFFTSTFLGIAVGLLSAFGIKTLYFGRHSTDREVAIMMLMAYLSYMVAELLSLSGILTVFFCGIVMSHYTWHNVTESSRITTRHAFATISFIAETFIFLYVGMDALDIDKWKETSASAGTSIAVSAILFGLVLIGRAAFIYPLATLSNCLKRRDSDKIVFRKQFSASGDSSSDNALLITCTIIVVLFSTMVFGSVTKPLINAVMLRNTKTTSDATDFASLEDLRLSFLENGGASEPRGTPSGPTSSFRLLIKYPTYTAHQLWRKFDDKFMRPVFGGRGFVPYARCSTTGAENANDAANETDN
>LjNHX5
MGFDLGSVVPTMNTLSTSDHTSVVSMNLFVALLCACIVIGHLLEENRWMNESITALAIGLCTGVIILLTTQGKSSHLLVFSEDLFFIYLLPPIIFNAGFQVKKKQFFRNFTTITLFGAVGTLISFIIISLGAINFFKKMNIGSLEIGDFLAIGAIFSATDSVCTLQVLNQDETPLLYSLVFGEGVVNDATSVVLFNAVQSFDLSNISTAIAFKLLGNFIYLFIMSTLLGFVAGLLSAYIIKKLCFGRHSTDREVAIMILMAYLSYMLAELFYLSAILTVFFCGIVMSHYTWHNVTESSRITTKHTFATLSFVAEIFIFLYVGMDALDIEKWRFVSDSPGTSIGVTIWWAGLMRGAVSMALAYNQFTRSGHTQLRGNAIMITSTITVVLFSTVVFGLLTK…
>LjNHX6
MASVVGEGALVYQVEEEESSSSTNITDAVIFFGISLVLGIASRHLLRGTRVPYTVALLVCGIGLGSLGANIDPDLLLAVFLPALLFESSFSMEVHQIKIQFLLFLDRLYQEDKEYPSSDLLRFCMPSPQMRCMVQMLLLAGPGVLISTFCLGSAIKLIFPYGWNWKTSLLLGGLLSATDPVAVVALLKELGASKKLSTIIEGESLMNDGTAIVVYQLFYRMVTGWSFNWGAVVKYLAQASLGAVGIGLAFGLASVLWLGFIFNDSVIEVTLTFAISYIAYFTAQEGFDVSGVLAVMTLGMFYSAVAKTAFKGDGQESLHHFWEMVAYIANTLIFILSGVVIAEGVLGSDNVLKTQGNSWGYLVLLYVFVQLSRVVVVGLLYPFLRYFGYGLDWKEATIL…
>LjNHX7
MNTITTSRVFSELAQNVASAAHHQVVPITVFVAVLCLCLVIGHLLEENRWVNESITAICVGCVAGTIILIISKGKSSHILRFDEQLFFIYLLPPIIFNAGFQVKKKQFFHNFLTIMLFGVVGVFISTAIITAGIGTIFSSTDTVCTLQVLHQDETPLLYSLVFGEGVVNDATSVVLFNAVQKIDVSRLDGWAALHVLLDFLYLFSTSTALGVIVRLPSCNSAQAINYTHMAGLLTAYVLRGLYFGRHSTVREISLMVLIAYLSYMLAELLNLSGILTVFFCGVLMSHYAWHNVTESSRITTRHVFAMMSFIAETFIFLYVGMDALDIEKWRTSKLSVWDSMGIYGAVIFLILLGRAAFVFPLSVFSNCMNRHAERAPLLTFKHQVVIWWAGLMRGAVSI…
>PtNHX1
MESYVSSIGSRLQMLTTSDHASVVSMNLFVALLCACIVIGHLLEENRWMNESITALIIGLCTGVVILLISGGKSSHLLVFSEDLFFIYLLPPIIFNAGFQVKKKQFFRNFMTIMLFGAVGTLISCFVISLGAMQFFKKLDIGPLDIGDYLAIGAIFAATDSVCTLQVLNQDETPLLYSLVFGEGVVNDATSVVLFNAIQSFDLTNINAAIAWDFVRNFFYLFLASTLLGVLTGLVSAYIIRRLYFGRHSTDREVALMILMAYLSYMMAELFYLSGILTVFFCGIVMSHYTWHNVTESSRVTTKHAFATLSFVAETFIFLYVGMDALDIEKWRFVSHSPGTSVAVSSILLGLLMVGRAAFVFPLSFLSNLTKKSPNEKISFKQQFIIWWAGLMRGAVSMA…
>PtNHX2
MEAYMSSIGSKLQMLYTSDHASVVSMNLFVALLCACIVIGHLLEETRWMNESITALTIGVGTGIVILLISGGKSSRLLVFSEDLFFIYLLPPIIFNAGFQVKKKQFFRNFMTIMLFGAVGTLICCAIISIGAMQIFEKMDIGPLDIGDYLAIGAIFAATDSVCTLQVLGQDDTPLLYSLVFGEGVVNDATSVVLFNAIQSFDLTNINAVIAWEFVRNFLYLFLTSTMLGVLTGLVSAYIIKKLYFGRHSTDREVALMILMAYLSYMLAELFYLSGILTVFFCGIVMSHYTWHNVTESSRVTTKHAFATLSFVAEIFIFLYVGMDALDIEKWRFVSDSPGTSVAVSSILLGLVMVGRAAFVFPLSFVSNLSKKSPNEKIGFRQQFIIWWAGLMRGAVSMA…
>PtNHX3
MLTESFSLKISSNHLTFEMATKISNAAMFGLSPENMSSHEHLPLELDSSFLNTSTIIALCVFFALLCACIIIGHLLEEHRWANESITALLLGLCAGGVVLLVRKGASSHLLKFSEDLFFLYLLPPIIFNAGFQVKKKRFFKNFSTILLFGIFGTVISFCIISLGVFWIFRKIGVESLSLKDHLAIGAIMSATDSVCTLQVLSQDETPFLYSIVFGEGVVNDATSIVLFNSVQTLDFHNIDGLTVLKLIGTFLYLLLTSTALGIAVGLLSAFIIKTLYFGRHSTDREFALMILMAYLSYLLAELLNLSGILTVFFCGIVMSHYTWHNVTESSRITTKHAFATMSFIAETFIFLYVGMDALDIDKWRESKASAGTSAAVSSTLFALVLVGRAAFVFPIANI…
>PtNHX4
MADILWKMGAMLSSDHSSVVPINLFVALLCACIVIGHLLEEQRWMNESITALAVGLCTGVVILLTTGGKSSHLLVFSEDLFFIYLLPPIIFNAGFQVKKKQFFRNFMTIILFGAVGTLISTAIISIGATHFFKKMNISSLRIGDYLAIGAIFSATDSVCTLQVLNQDETPLLYSLVFGEGVVNDATSVVLFHAIQSIDLSHINSSIAAEFLGNFLYLFISSTILGVLTGLLSAYIIKKLYFGRHSTDREVALMILMAYLSYMLAELFYLSAILTVFFCGIVMSHYTWHNVTESSRITTKHAFATWSFVAEIFIFLYVGMDALDIEKWKVVSDSPGTSVMVSSILLGLVLVGRAAFVFPLSFLSNLTKKFPYEKIDIKQQVTIWWAGLMRGAVSMALAYN…
>PtNHX5
MNFGLRMVSEPDQAPIHSITLFVALLCACILIGHLLEKHRWINESITALAIGLCTGTLILLTTQGRSSHILLFDEQLFFIYLLPPIIFNAGFQVKKKQFFRNFMTIMLFGAVGTLISFIIISLGTAQLFKKLDIGFLDTVDYLGLGAIFSATDSVCTLQVLDQEETPLLYSLVFGEGVVNDATSIVLFNAILRFDLSHITSSSAIHLLGNFFYLFGASTALGIAVGLISAYIIKKLYFGRHSTDREVALMILMAYLSYIMAELFNLSGILTVFFCGILMSHYTWHNVSESSRVTTKHAFATMSFISEIFIFLYVGMDALDIEKWKIVSKSPGKSIGVSSILLGLVLVGRAASIFPLSFISNLTKKSQSDKIGFKQQIVIWWAGLMRGAVSMALAYNQFT…
>PtNHX6
MSTVVEELMQMQISPAGGGGDSQSHPGKEQQAAGVGILLQIMMLVLSFVLGHVLRRHRFYYLPEASASLLIGLIVGALANISNTETSIRAWFNFHEEFFFLFLLPPIIFQSGFSLSPKPFFSNFGAIVTFSILGTFIASVVTGVLVYLGGLIYLTYRLPFVECLMFGALISATDPVTVLSIFQELGIDTNLYALVFGESVLNDAMAISLYRTMSSLKSHAPGQNFFMVVFRFLETFVGSLSAGVGVGFISALLFKYAGLDIDNLQNLECCLFVLFPYFSYMLAEGLGLTGIVSILFTGIVMKHYTYSNLSENSQRFVSAFFHLISSLAETFVFIYMGFDIAMEQHSWSHVGFIFFSIIFIGVARAANVFSCAYLVNLVRPAPRQIPVKHQKALWYSGLR…
>PtNHX7
MGSAIEKGVGLPYRIWESSSSSSAASDEWNPTDTVLFFGLSLLLGIACRHLLRGTRVPYTVALLVVGIALGSLEYGTSHQLGRIGDGIRLWAHIDPDLLLAVFLPALLFESSFSMEVHQIKRCMVQMLLLAVPGVLISTCCLGCALKLIFPYNWSWTTSLLLGGLLSATDPVAVVALLKELGASKKLSTIIEGESLMNDGTAIVVYQLFYRMVLGESFTSGAIIKFLTQVSLGAVGIGIAFGIASVLWLGFIFNDTVIEIALTLAVSYVTYFTAQEGAAVSGVLAVMTLGMFYAAVARTAFKGDGQQSLHHFWEMVAYIANTLIFILSGVVIAEGVLSSGNTFHSHGHTWGYLFLLYIFVQLSRFIVVGALYPFLRYFGYGLDWKEATIVIWSGLRGAV…
>PtNHX8
MGSVTEEEGVLLYRVLSSSSSSSASSDEWNPTDTVIFFGLSLGLGIACRHVLRGTRVPYTVALLVIGIALGSLEYGTSHKLGRIGDGIRLWAHIDPDLLLAVFLPALLFESSFSMEVHQIKRCMAQMLLLAGPGVLISTCCLGCALKLIFPYNWNWTTSLLLGGLLSATDPVAVVALLKELGASKKLSTIIEGESLMNDGTAIVVYQLFYRMVLGESFNWVSILKFLTQVSLGAVGIGIAFGIASVLWLGFIFNDTVIEIALTLAVSYIAYFTAQEGAGVSGVLAVMTLGMFYAAVARTAFKGDGQQSLHHFWEMVAYIANTLIFILSGVVIAEGVLSSGNIFHNHGHAWGYLFLLYIFVQLSRFVVVGVLYPFLRYFGYGLDWKEATILIWSGLRGAV…
>StNHX1
MASVLASLFPKLGSLGTSDHASVVSINLFVALLCACIIIGHLLEENRWINESITALIIGLGTGVVILLVSGGKSSHLLVFSEDLFFIYVLPPIIFNAGFQVKKKQFFVNFITIMMFGAIGTLVSCAIISLGAIQTFKKLDIEFLDIGDYLAIGAIFAATDSVCTLQVLHQDETPLLYSLVFGEGVVNDATSVVLFNAIQNFDLTSVNLSIALSFLGNFFYLFLASTLLGAGTGLLSAYIIKKLYFGRHSTDREVALMMLMAYLSYMLAELFYLSGILTVFFCGIVMSHYTWHNVTESSRVTTRHAFATLSFLAETFLFLYVGMDALDIEKWKFVGDRPGLSISVSSILMGLILLGRAAFVFPLSFFSNLMKKSSEQKITFRQQVIIWWAGLMRGAVSMA…
>StNHX2
MVFDFGTLVASLNRLSTSDHQSVVSINLFVALICACIIIGHLLEENRWMNESITALVIGLCTGVVILLISGGKNSHILVFSEDLFFIYLLPPIIFNAGFQVKKKSFFRNFSTIMLFGAVGTLISFIIISFGATSIFKKWNIGNLEIGDYLAIGAIFSATDSVCTLQVLSQDETPLLYSLVFGEGVVNDATSVVLFNAVQNFDLSHINTSKALELVGNFLYLFASSTILGVATGLLSAYIIKKLYFGRHSTDREVAIVILMAYLSYMLAELFYLSAILTVFFSGIVMSHYTWHNVTESSRVTTKHAFATLSFIAEIFIFLYVGMDALDMEKWRFVSDSPQLSLQVSSILLGLVLVGRAAFVFPLSFLSNLMKKSPEERISFNQQIIIWWAGLMRGAVSMA…
>StNHX3
MGLDAVARLGVSLLSDDDQVSVDSITLFVALLCGCIVIGHLLEESRWINDSITALVIGLCTGGIILLTTKGKSSHLLEFDEQLFFIYVLPPIIFNAGFQVKKKQFFRNFVTIMLFGAVGTLISFSIISFGAKELLGKLDIGFLELRDYLAIGAIFSATDSVCTLQVLNQDETPRLYSLVFGEGVVNDATSVVLFNAIQKLDLSHINSRAALVFTGNFLYLFLASTFLGVLIGLLSAYLIKKIYLGRHSTDREVALMILMAYLSYVMAELFDLSGILTVFICGIVMSHYTWHNVTVNSKVTTRHAFATLSFIAEIFIFLYVGMDALDIEKWRFVKDSPGKSVGVSAALLGLVLVGRACFVFPLSLLSNFLKRSEHDKFGLKQQVTIWWAGLMRGSVSMAL…
>StNHX4
MSLLFGAIQTFKKLDIEFLDIGDYLAIGAIFAATDSVCTLQVLHQDETPLLYSLVFGEGVVNDATSVVLFNAIQNFDLTSVNLSIALSFLGNFFYLFLASTLLGAGTGLLSAYIIKKLYFGRHSTDREVALMMLMAYLSYMLAELFYLSGILTVFFCGIVMSHYTWHNVTESSRVTTRHAFATLSFLAETFLFLYVGMDALDIEKWKFVGDRPGLSISVSSILMGLILLGRAAFVFPLSFFSNLMKKSSEQKITFRQQVIIWWAGLMRGAVSMALAYNKFTRGGHTQLQDNAIMITSTITIVLFSTMVFGLMTKPLISLLLPPQRQLSTVSSGANTPKSLTAPLLGSREDSEVDLNVPDLPHPPSLRMLLTAPSHKVHRYWRKFDDAFMRPMFGGRGFA…
>StNHX5
MELFDYVNDNSSHEMVVSITVFVAILCLCLVIGHLLEENRWVNESITAIIVGLISGTVILLISKGKSSHILRFNEEVFFIYLLPPIIFNAGYQVKKKQFFHNFLTIMSFGVIGVFISSSIIASGSWWIFPKLNFNGLTIRDYLGIGAIFSATDTVCTLQVLHQDETPLLYSLVFGEGVVNDATSVVLFNAVQKIDVARFNGWSAFHVFLDFLYLFSTSTCLGVVAGLITSYILKGLYFGRHSTVREISLMLLMAYLSYMLAELWSLSGILTVFFSGILMSHYAWHNVTDSSRITTRHAFEAMSFIAETFIFLYVGMDALDIEKWKMSQQSVWTSMGIYITVLMLMAIGRAAFVFPLSVLSNFMNRNATRTPPITFKHQIVIWWAGLMRGAVSIALAFKQ…
>TaNHX1
MGYQVVAAQLARLSGALGTSDHASVVSITLFVALLCACIVLGHLLEENRWLNESITALIIGLCTGVVILMTTKGKSSHVLVFSEDLFFIYLLPPIIFNAGFQVKKKQFFRNFMAITLFGAVGTMMSFFTISLAAIAIFSRMNIGTLDVSDFLAIGAIFSATDSVCTLQVLNQDETPFLYSLVFGEGVVNDATSVVLFNALQNFDPNQIDAIVILKFLGNFCYLFVSSTFLGVFTGLLSAYVIKKLYIGRHSTDREVALVMLMAYLSYMLAELLDLSGILTVFFCGIVMSHYTWHNVTESSRVTTKHAFATLSFIAETFLFLYVGMDALDIEKWKFASDSPGKSIGISSILLGLVLVGRAAFVFPLSFLSNLTKKTELEKISWRQQIVIWWAGLMRGAVS…
>TaNHX2
MGLDLGALALKYTGLAVSDHDSIVAINIFIALLCGCIVFGHLLEGNRWVNESTTALVLGLITGGVILICTKGVNSRILIFSEDIFFIYLLPPIIFNAGFQVKKKQFFRNFATIILFGAAGTLISFVIITFGAMGLFSKLDVGPLELGDYLAIGAIFSATDSVCTLQVLNQDEAPLLYSLVFGEGVVNDATSVVLFNAIQNIDINHFDVFVLLQFIGKFLYLFFTSTVLGVAAGLLSAYIIKKLCFARHSTDREVAIMILMAYLSYMLSMLLDLSGILTVFFCGIVMSHYTWHNVTESSRVTTKHTFATLSFIAEIFLFLYVGMDALDIDKWKLASSSPKKPIALSAVILGLVMVGRAAFVFPLSFLSNLSKKESHPKISFNQQVIIWWAGLMRGAVSIA…
>TaNHX3
MGLDLGALALKYTGLAVSDHDSIVAINIFIALLCGCIVFGHLLGGNRWVNESTAALVLGLITGGVILICTKGVNSRILIFSEDIFFIYLLPPIIFNAGFQVKKKQFFRNFATIILFGAAGTLISFVIITFGAMGLFSKLDVGPLELGDYLAIGAIFSATDSVCTLQVLNQDEAPLLYSLVFGEGVVNDATSVVLFNAIQNIDINHFDVFGLLQFIGKFLYLFFTSTVLGVAAGLLSAYIIKKLCFARHSTDREVAIMILMAYLSCMLSMLLDLSGILTVFFCGIVMSHYTWHNVTESSRVTTKHTFATLSFIAEIFLFLYVGMDALDIDKWKLASSSPKKPIALSAVILGLVMVGRAAFVFPLSFLSNLSKKESHPKISFNQQVIIWWAGLMRGAVSIA…
>OsNHX1
MGMEVAAARLGALYTTSDYASVVSINLFVALLCACIVLGHLLEENRWVNESITALIIGLCTGVVILLMTKGKSSHLFVFSEDLFFIYLLPPIIFNAGFQVKKKQFFRNFMTITLFGAVGTMISFFTISIAAIAIFSRMNIGTLDVGDFLAIGAIFSATDSVCTLQVLNQDETPFLYSLVFGEGVVNDATSIVLFNALQNFDLVHIDAAVVLKFLGNFFYLFLSSTFLGVFAGLLSAYIIKKLYIGRHSTDREVALMMLMAYLSYMLAELLDLSGILTVFFCGIVMSHYTWHNVTESSRVTTKHAFATLSFIAETFLFLYVGMDALDIEKWEFASDRPGKSIGISSILLGLVLIGRAAFVFPLSFLSNLTKKAPNEKITWRQQVVIWWAGLMRGAVSIAL…
>OsNHX2
MELGLGMGMGLGDPPADYGSIAAVGMFVALICVCIVVGHLLEESRWMNESITALIIGLGTGGVILMVSSWKHSRILVFSEDLFFIYLLPPIIFNAGFQVKKKQFFRNFMTITLFGAIGTLISFSVISLGSLGLISRLNIGSLDLGDYLALGAIFSATDSVCTLQVLNQDETPFLYSLVFGEGVVNDATSVVLFNAMQNFDLANFSSVKFLQFIGNFLYLFATSTFLGVAAGLLSAYIIKKLYFGRHSTDREVSIMMLMAYLSYMLAELLDLSGILTVFFCGIVMSHYTWHNVTESSRVTTKHAFATLSFIAETFLFLYVGMDALDMEKWKIVGETFSPMKSIALSSTILFLVLVARAAFVFPLSFLANLTKKTEEGKISIKQQVIIWWAGLMRGAVSIA…
>OsNHX3
MGLDLGALVLKSGGLLVSDYDSIVAINIFVALLCSCIVIGHLLEGNRWVNESITALVMGLITGGVILLVSGGKNSHILVFSEDLFFIYLLPPIIFNAGFQVKKKQFFRNFMTIILFGAVGTLISFVIISLGAMTLFKKLDVGPLQLGDYLAIGAIFSATDSVCTLQVLNQDETPLLYSLVFGEGVVNDATSVVLFNAIEDIDIANFDSLVLLAFIGNFLYLFFTSTLLGVVAGLLSAYIIKKLCFARHSTDREVAIMILMAYLSYMLSMLLDLSGILTVFFSGIVMSHYTWHNVTESSRITTKHTFATLSFIAEIFLFLYVGMDALDIEKWKLASSSPKKPIALSATILGLVMVGRAAFVFPLSFLSNLSKKETRPKISFKQQVIIWWAGLMRGAVSIA…
>OsNHX4
MAWWWWWSEAVVVGGGTGGGSSGTVVSICVFTAVLCVCLVAGHLLEENKWVNESITALLIGCVVGAIIFLLSEGKNSRILRFDEQLFFIYVLPPIIFNAGFQVKKKQFFHNFLTIMSFGIFGVFISVAIVSTGCYWLFPKVGFGDLGAVDYLALGAIFSSTDTVCTLQVISQDETPRLYSLVFGEGVVNDATSVVLFNAIKNLDITQLKGGVALKVISDFLYLFFTSTMLGVTIGLSTAYALKALYFGRHSTDREVALMALMAYLSYMLAEFLDLSGILMVFFCGIVMSHYAWHNVTESSRITTRHIFATLSFIAETFIFLYVGMDALDIDKWKTSETSFKTSLGIFGIIISLVLLGRAAFVFPLSIMSNYMSGSSEKAPITFNHQVVIWWAGLMRGAV…
>OsNHX5
MLAKGCVVGAIIFLLSEGKNSRILRFDEQLFFIYVLPPIIFNAGFQVKKKQFFHNFLTIMSFGIFGVFISVAIVSTGCYWLFPKVGFGDLGAVDYLALGAIFSSTDTVCTLQVISQDETPRLYSLVFGEGVVNDATSVVLFNAIKNLDITQLKGGVALKVISDFLYLFFTSTMLGVTIGLSTAYALKALYFGRHSTDREVALMALMAYLSYMLAEFLDLSGILMVFFCGIVMSHYAWHNVTESSRITTRHIFATLSFIAETFIFLYVGMDALDIDKWKTSETSFKTSLGIFGIIISLVLLGRAAFVFPLSIMSNYMSGSSEKAPITFNHQVVIWWAGLMRGAVSIALAYNQFTFSGVTLDPVHATIITSTIIVVFFTTLVFGFLTRPLISAILPHQHRQ…
>OsNHX6
MAWWWWWSEAVVVGGGTGGGSSGTVVSICVFTAVLCVCLVAGHLLEENKWVNESITALLIGCVVGAIIFLLSEGKNSRILRFDEQLFFIYVLPPIIFNAGFQVKKKQFFHNFLTIMSFGIFGVFISVAIVSTGCYWLFPKVGFGDLGAVDYLALGAIFSSTDTVCTLQVISQDETPRLYSLVFGEGVVNDATSVVLFNAIKNLDITQLKGGVALKVISDFLYLFFTSTMLGVTIGLSTAYALKALYFGRHSTDREVALMALMAYLSYMLAEFLDLSGILMVFFCGIVMSHYAWHNVTESSRITTRHIFATLSFIAETFIFLYVGMDALDIDKWKTSETREFTTN
>OsNHX7
MDNPEAEPDDAVLFVGVSLVLGIASRHLLRGTRVPYTVALLVLGVALGSLEFGTKHGMGKLGAGIRIWANINPDLLLAVFLPALLFESSFSMEIHQIKKCMAQMVLLAGPGVLISTFFLGSALKLTFPYNWNWKTSLLLGGLLSATDPVAVVALLKELGASKKLSTIIEGESLMNDGTAIVVYQLFYRMVLGRTFDAGSIIKFLSEVSLGAVALGLAFGIASVLWLGFIFNDTIIEIALTLAVSYIAFFTAQDALEVSGVLTVMTLGMFYAAFAKTAFKGDSQQSLHHFWEMVAYIANTLIFILSGVVIADGVLENNVHFERHGASWGFLLLLYVFVQISRILVVVILYPLLRHFGYGLDLKEATILVWAGLRGAVALSLSLSVKRASDAVQTHLKPVD…
>SbNHX1
MGLGVVAELVRLGVLSSTSDHSSVVSINLFVALLCACIVLGHLLEENRWVNESITALIIGLCTGVVILLTTKGKSSHILVFSEDFFFIYLLPPIIFNAGFQVKKKQFFRNFMTITLFGAVGTMISFFTISLGAIAIFSRMNIGTLDVGDFLAIGAIFSATDSVCTLQVLHQDETPLLYSLVFGEGVVNDATSVVLFNALQNFDLNHIDVTVVLNFLGNFCYLFLSSTLLGVFSGLLSAYIIKKLYIGRHSTDREVALMMLMAYLSYMLAELLDLSGILTVFFCGIVMSHYTWHNVTESSRVTTKHAFATLSFIAETFLFLYVGMDALDIEKWEFASDIPGKSIGISSILLGLVLVGRAAFVFPLSFLSNLTKKSPLEKITLRQQVVIWWAGLMRGAVSI…
>SbNHX2
MGLMALGDPPADYASIAAVGLFVALMCVCIIVGHLLEENRWMNESITALFIGLGTGAVILFASSGKHSRVLQFSEDLFFIYLLPPIIFNAGFQVKKKQFFRNFITITLFGAVGTLISFTVISLGALGLVSRLNIGALELGDYLALGAIFSATDSVCTLQVLSQDETPFLYSLVFGEGVVNDATSVVLFNAIQNFDLGNISGAKLLNFIGSFLYLFGTSTILGVASGLLSAYIIKKLYFGRHSTDREVSIMMLMAYLSYMLAELLDLSGILTVFFCGIVMSHYTWHNVTESSRVTTKHAFATLSFIAETFLFLYVGMDALDIEKWKIVSQTYSPVKSVALSSTILALVLVSRAAFVFPLSFLSNLTKKTPNGKISFRQQVIVWWAGLMRGAVSIALAYNK…
>SbNHX3
MGLGLGALLKSGALSVSDYDAIVSINIFIALLCSCIVIGHLLEGNRWVNESITALVMGLITGGVILLVTNGTNSRILVFSEDLFFIYLLPPIIFNAGFQVKKKQFFRNFITIILFGAVGTLISFVIISLGAMGLFKKLDVGPLELGDYLAIGAIFSATDSVCTLQVLNQDETPLLYSLVFGEGVVNDATSVVLFNAIENLDIANFDAIVLLNFVGKFLYLFFTSTILGVATGLLSAYIIKKLCFARHSTDREVSIMILMAYLSYMLSMLLDLSGILTVFFCGIVMSHYTWHNVTESSRVTTKHTFATLSFIAEIFLFLYVGMDALDIEKWKLASSSPKKPIALSAIILGLVMVGRAAFVFPLSFLSNLSKKEARPKISFKQQVIIWWAGLMRGAVSIAL…
>SbNHX4
MAAALWETLLAASAADGTGGSSTTVVSICVFTAVLCLCLVAGHLLEENKWVNESITALIIGCIVGAIIFLLTEGKHSHILRFDEQLFFIYVLPPIIFNAGFQVKKKQFFHNFMTIMSFGVFGVFISGAIVSAGCYWLFPKVGFGKLDAVDYLALGAIFSSTDTVCTLQVINQDETPRLYSLVFGEGVVNDATAVVLFNAIKNLDISQLKGGVVLKLIADFLYLFATSTIIGISIGLATAYVLKALYFGRHSTDREVALMALMAYLSYMLAELLELSGILTVFFCGIVMSHYAWHNVTESSRITTKHIFATLSFIAETFIFLYVGMDALDVDKWKTSKESFKTSIGIFGIVVLLILLGRVAFVFPVSILSNILSGSSERTPITFKHQVVIWWAGLMRGAV…
>SbNHX5
MGLDLGALLKSGALSVSDYDAIVSINIFIALLCSCIVIGHLLEGNRWVNESITALVMGLITGGVILLVTNGTNSRILVFSEDLFFIYLLPPIIFNAGFQVKKKQFFRNFITIILFGAVGTLISFVIISLGAMGLFKKLDVGPLELGDYLAIGAIFSATDSVCTLQVLNQDETPLLYSLVFGEGVVNDATSVVLFNTIENLDIANFDAIVLLNFVGKFLYLFFTSTILGVATGLLSAYIIKKLCFARHTFATLSFIAEIFLFLYVGMDALDIEKWKLASSSPKKPIALSAIILGLVMVGRAAFVFPLSFLSNLSKKEARPKISFKQQVIIWWAGLMRGAVSIALAYNKFTSSGHTEVRVNAIMITSTVIVVLFSTMVFGLLTKPLLSLLIPPRTGLNTSS…
>SbNHX6
MLGPLARFQVKKKQFFHNFMTIMSFGVFGVFISGAIVSAGCYWLFPKVGFGKLDAVDYLALGAIFSSTDTVCTLQVINQDETPRLYSLVFGEGVVNDATAVVLFNAIKNLDISQLKGGVVLKLIADFLYLFATSTIIGISIGLATAYVLKALYFGRHSTDREVALMALMAYLSYMLAELLELSGILTVFFCGIVMSHYAWHNVTESSRITTKHIFATLSFIAETFIFLYVGMDALDVDKWKTSKESFKTSIGIFGIVVLLILLGRVAFVFPVSILSNILSGSSERTPITFKHQVVIWWAGLMRGAVSIALAYNQFTFSGVTSDPVHATIITSTIIVVFFTTLVFGFLTRPLISAMLPHQSRALSRGHSTGSNSPKDDDLALPFLSSDEGASGSGIVLEQ…
>CmNHX1
MTPILNYVVSKWQALSTSDHASVVSINLFVALLCACIVIGHLLEETRWMNESITALLIGMFAGIVILLVSRGKSSHLLLFSEDTFFIYLLPPIIFNAGFQVKKKQFFVNFMTIMLFGAIGTLVSCFIISLGAFQFFKKMDVGSLDIADILAIGAIFAATDSVCTLQILSQDETPLLYSLVFGEGVVNDATSVVLFNAIQSIDLSNIDARVAIHFLGSFFYLFSTSTLLGVFVGLLSAYIIRKLYFGRHSTDREVALMILMAYLSYMLAELLDLSGILTVFFCGIVMSHYTWHNVTESSRVTTKHAFATLSFISESFIFVYVGMDALDIEKWSFVSDSPGTSVAVSAMLLGLVMVGRAAFVFPLSFLSNLAKKSADEKITFREQVIIWWAGLMRGAVSIA…
>CmNHX2
MTPVWSYVMSKWQTLSTSDHASVVSINLFVALLCACIVIGHLLEETRWMNESITALFIGMFTGVIILLVSGGKSSHLLLFSEDIFFIYLLPPIIFNAGFQVKKKQFFVNFITIMLFGAIGTLVSCSIISLGAFQIFQRMDVGSLDIADILAIGAIFAATDSVCTLQILNQDETPLLYSLVFGEGVVNDATSVVLFNAIQSLDLSKVDARVALHFIGSFFYLFSTSTLLGVFVGLLSAYTIKKLYFGRHSTDREVALMMLMAYLSYMLAELLDLSGILTVFFCGIVMSHYTWHNVTESSRVTTKHAFATLSFISETFIFVYVGMDALDIEKWSYVSDSPGTSVAVSAILLGLVMVGRAAFVFPLSFLSNLVKKSASEKITFRQQVIIWWAGLMRGAVSIA…
>CmNHX3
MASEMIVESGSSIIDFGMELVADHTSVVSLNLFVALLCGCIVVGHLLEENRWINESITALVIGLCTGIIILLTTRGKSSHLFLFNEELFFIYLLPPIIFNAGFQVKKKQFFRNIMTIVLFGAFGTLISFCIISLGALHFFQKMNIGSLDLGDYLAIGAIFSATDSVCTLQVLNQDETPLLYSLVFGEGVVNDATSVVLFNAIQNFDLSHMNSSIILQFIGNFLYLFIASTVLGILVGLLSAYIIKKLYFGRHSTDREVALMILMAYFSYMLAELFYLSAILTVFFCGIVMSHYTWHNVTESSRVTTKHAFATLSFVAEIFIFLYVGMDALDIEKWRFVSHSPGKSIGVSSILLGLVLVGRAAFVFPLSSLSNLTKKSSHEKLNLEQQVTIWWAGLMRGA…
>CmNHX4
MDSFLGNTVMKLALKSDPEEHRVALFVLLLCACIVIGHLLEKSRWINESVTAIFIGLFTGTLILLTTKGRNSRILVFSEELFFIYVLPPIIFNAGFQVKKKQFFRNFLMIMLFGAVGTAISFFIISLGSLHIFKKLDIGFLDVGDYFALGAILSATDSVCTLQVLNQDETPLLYSLVFGEGVVNDATSVVLFKAIQRFDLSHITSSNAIQLLGNFSYLFFMSTLLGVIVGLSSAYIIKKLYFGRHSTDREVALMILMPYLSYMTAELCNLSGILTMFFCGIVMSHYTWHNVTESSRVTTKHTFATLSFVSEIFIFLYVGMDALDIEKWKIVGRRPWTSAGVSLILLGLVLAARAAFVFPLSFISNLTRKSQSDKIGFKQQVTIWWAGLMRGAVSVALAY…
>CmNHX5
MGVLETVKNIGSDHAPVVPLTLFVAVLCLCLVIGHLLEENRWVNESITAIIIGGVTGTIILVCSKGKDSHILTFNEEVFFMYLLPPIIFNAGFQVKKKQFFHNFLTIMLFGVIGVFISALIITSGSQWLFTRMGFHGLSARDYIAIGAIFSSTDTVCTLQVLHQEETPLLYSLVFGEGVVNDATSVVLFNAVQKIDITRLNSKTALHVFGDFCYLFSTSTILGVTAGLLTAYILKTLYFGRHSSVRELAIMVLMAYLSYMLAELLELSGILTVFFCGVIMSHYAWHNVTDSSKITTRHVFSMMSFVAETAIFLYVGMDALDIEKWKITKLSLWKLVGTYSITVFLILLGRAAFVFPLSAISNYFNKCEDRSSSSSIITFKQQIIIWWAGLMRGAVSIAL…
>SlNHX1
MASVLASLFPKLGSLGTSDHASVASINLFVALLCACIIIGHLLEENRWVNESITALIIGLGTGVVILLVSGGKSSHLLVFSEDLFFIYLLPPIIFNAGFQVKKKQFFVNFMTIMLFGAIGTLVSCAIISLGAIQTFKKLDIEFLDIGDYLAIGAIFAATDSVCTLQVLHQDETPLLYSLVFGEGVVNDATSVVLFNAIQNVDLTSLNPSIALSFLGNFFYLFLASTLLGAGTGLLSAYIIKKLYFGRHSTDREVALMMLMAYLSYMLAELFYLSGILTVFFCGIVMSHYTWHNVTESSRVTTRHTFATLSFLAETFLFLYVGMDALDIEKWKFVGDRPGLSISASSILMGLILLGRAAFVFPLSYLSNLMKKSSEEKITFRQQVIIWWAGLMRGAVSMA…
>SlNHX2
MVFDFGTLVASLNRLSTSDHQSVVSINLFVALICACIIIGHLLEENRWMNESITALVIGLCTGVVILLISGGKNSHILVFSEDLFFIYLLPPIIFNAGFQVKKKSFFRNFSTIMLFGAVGTLISFIIISFGATSIFKKWNIGHLEIGDYLAIGAIFSATDSVCTLQVLSQDETPLLYSLVFGEGVVNDATSVVLFNAVQNFDLSHINTSKALELVGNFLYLFASSTILGVVAGLLSAYIIKKLYFGRHSTDREVAIVILMAYLSYMLAELFYLSAILTVFFSGIVMSHYTWHNVTESSRVTTKHAFATLSFIAEIFIFLYVGMDALDIEKWRFVSDSPQLSVQVSSILLGLVLVGRAAFVFPLSFLSNLMKKSPEERISFNQQIIIWWAGLMRGAVSVA…
>SlNHX3
MVFDFGTLVASLNRLSTSDHQSVVSINLFVALICACIIIGHLLEENRWMNESITALVIGLCTGVVILLISGGKNSHILVFSEDLFFIYLLPPIIFNAGFQVKKKSFFRNFSTIMLFGAVGTLISFIIISFGATSIFKKWNIGYLEIGDYLAIGAIFSATDSVCTLQVLSQDETPLLYSLVFGEGVVNDATSVVLFNAVQNFDLSHINTSKALELVGNFLYLFASSTILGVVAGLLSAYIIKKLYFGRHSTDREVAIVILMAYLSYMLAELFYLSAILTVFFSGIVMSHYTWHNVTESSRVTTKHAFATLSFIAEIFIFLYVGMDALDIEKWRFVSDSPQLSVQVSPILLGLVLVGRAAFVFPLSFLSNLMKKSPEERISFNQQIIIWWAGLMRGAVSVG…
>SlNHX4
MASVLASLFPKLGSLGTSDHASVASINLFVALLCACIIIGHLLEENRWVNESITALIIGLGTGVVILLVSGGKSSHLLVFSEDLFFIYLLPPIIFNAGFQVKKKQSFVNFMTIMLFGAIGTLVSCAIISLGAIQTFKKLDIEFLDIGDYLAIGAIFAATDSVCTLQVLHQDETPLLYSLVFGEGVVNDATSVVLFNAIQNVDLTSLNPSIALSFLGNFFYLFLASTLLGAGTGLLSAYIIKKLYFGRHSTDREVALMMLMAYLSYMLAELFYLSGILTVFFCGIVMSHYTWHNVTESSRVTTRHTFATLSFLAETFLFLYVGMDALDTEKWKFVGDRPGLSISASSILMGLILSGESCFCFSIIILIQLNEEILGRKNTFRQQVIIWWAGLMRGAVSMA…
>SlNHX5
MGLDAVARLGVSILSDGDQVSVDSITLFVALLCGCIVIGHLLEESRWINDSITALVIGLSTGGIILLTTKGKSSHLLEFDEQLFFIYVLPPIIFNAGFQVKKKQFFRNFVTIMLFGAVGTLISFSIISFGAKELLGKLDIGFLELRDYLAIGAIFSATDSVCTLQVLNQDETPRLYSLVFGEGVVNDATSVVLFNAIQKLDLSHINSRAALVFTGNFLYLFLASTFLGVLIGLLSAYLIKKIYLGRHSTDREVALMILMAYLSYVMAELFDLSGILTVFICGIVMSHYTWHNVTFNSKVTTRHAFATLSFIAEIFIFLYVGMDALDIEKWRFVKDSPGKSVGVSAALLGLVLVGRACFVFPLSLFSNCLKRSEHDKFGLKQQVTIWWAGLMRGSVSMAL…
>SlNHX6
MGLDAVARLGVSILSDGDQVSVDSITLFVALLCGCIVIGHLLEESRWINDSITTLVIGLSTGGIILLTTKGKSSHLLEFDEQLFFIYVLPPIIFNAGFQVKKKQFFRNFVTIMLFGAVGTLISFSIISFGAKELLGKLDIGFLELRDYLAIGAIFSATDSVCTLQALNQDETPRLYSLVFGEGVVNDATSVVLFNAIQKLDLSHINSRAALVFTGNFLYLFLASTFLGVLIGLLSAYLIKKIYLGRHSTDREVALMILMAYLSYVMAELFDLSGILTVFICGIVMSHYTWHNVTFNSKVTTRHAFATLSFIAEIFIFLYVGMDALDIEKWRFVKDSPGKSVGVSAALLGLVLVGRACFVFPLSLFSNCLKRSEHDKFGLKLQVTIWWAGLMRGSVSMAL…
>SlNHX7
MALFNYVNFIGHKNSHEMVVPITLFVAILCICLVIGSLFEENRWVNESITAIIIGLISGTIILLISKGKSSHILRFNEEVFFIYLLPPIIFNAGFQVKKKQFFHNFLTIMSFGVIGVFISSSIIASGSWWIFPKLNFNGLTIRDYLGIGAIFSSTDTVCTLQVLHQDETPLLYSLVFGEGVVNDATSVVLFNAVQKIDVARFNGWSAFHVFLDFLYLFSTSTCLGVAVGLITSYILKGLYFGRHSTVREISLMLLMAYLSYMLAELWNLSGILTVFFSGILMSHYAWHNVTDSSRITTRHAFEAMSFIAETFIFLYVGMDALDIEKWKMSQQSLAGSVWTSMGIYVTVLVLMAIGRAAFVFPLSVLSNFMNRNARRTPPITFKHQIVIWWAGLMRGAVS…
>PvNHX1
MGLGVVAHLVRLGVLGSTSDHASVVSINLFVALLCACIVLGHLLEENRWVNESITALIIGLCTGVVILLTTKGKSSHILVFSEDLFFIYLLPPIIFNAGFQVKKKQFFRNFMTITLFGAVGTMISFFTISLGAISIFSRMNIGTLDVGDFLAIGAIFSATDSVCTLQVLNQDETPLLYSLVFGEGVVNDATSVVLFNALQNFDLNQIDVAVVLKFLGNFCYLFLSSTFLGVFAGLLSAYIIKKLYIGRHSTDREVALMMLMAYLSYMLAELLDLSGILTVFFCGIVMSHYTWHNVTESSRVTTKHAFATLSFIAETFLFLYVGMDALDIEKWEFASDSPGKSICISSILLGLVLVGRAAFVFPLSFLSNLTKKTPLEKITWRQQIVIWWAGLMRGAVSI…
>GhNHX1
MVAPQLAAVFTKLQTLSTSDHASVVSMNIFVALLCACIVIGHLLEENRWMNESITALIIGVFTGVIILLTSGGKSSHLLVFSEDLFFIYLLPPIIFNAGFQVKKKQFFRNFITIMLFGAVGTLISCTIISLGVINFFKEMDIGSLDIGDFLAIGAIFAATDSVCTLQVLNQDETPLLYSLVFGEGVVNDATSVVLFNAIQSFDLVNTSPRILLEFIGSFLYLFLASTMLGVIVGLVSAYIIKKLYFGRHSTDREFALMMLMAYLSYIMAELFYLSGILTVFFCGIVMSHYTWHNVTESSRVTTKHAFATLSFVAETFLFLYVGMDALDMEKWRFVSDSPGTSVAVSAVLMGLVMVGRAAFVFPLSFLSNLAKKSTSEKISFREQIIIWWAGLMRGAVSM…
>GhNHX2
MVAPQLAAVFTKLQTLSTSDHASVVSMNIFVALLCACIVIGHLLEENRWMNESITALIIGVFTGVIILLTSGGKSSHLLVFSEDLFFIYLLPPIIFNAGFQVKKKQFFRNFITIMLFGAVGTLISCTIISLGVINFFKEMDIGSLDIGDFLAIGAIFAATDSVCTLQVLNQDETPLLYSLVFGEGVVNDATSVVLFNAIQSFDLVNTSPRILLEFIGSFLYLFLASTMLGVIVGLVSAYIIKKLYFGRHSTDREFALMMLMAYLSYIMAELFYLSGILTVFFCGIVMSHYTWHNVTESSRVTTKHAFATLSFVAETFLFLYVGMDALDMEKWRFVSDSPGTSVAVSAVLMGLVMVGRAGFXXXXXXXRAAFVFPLSFLSNLAKKSTSEKISFREQIIIW…
>GhNHX3
MAIGILNSLLASDHSSIVSMNLFVALLCGCIVIGHLLEESRWMNESITALVIGVCTGVVILLTTGGKSSHLLVFSEDLFFIYLLPPIIFNAGFQVKKKQFFRNFMTIMLFGAVGTLISFGIISAGAIQFFKELHIGDLQIGDYLAIGAIFSATDSVCTLQVLNQDETPLLYSLVFGEGVVNDATSVVLFNAIQSFDLNHINSTIALKFVGNFFYLFISSTLLGVVTGLLSAFIIKKLYFGRHSTDREVALMILMAYLSYMLAELFYLSGILTVFFCGIVMSHYTWHNVTESSRVTTKHAFATLSFVAEIFIFLYVGMDALDIEKWRVISDSPGKSVGVSSILLGLILVGRAAFVFPLSFISNLTKKAPHEKIEFKQQVTIWWAGLMRGAVSMALAYNQF…
>GhNHX4
MVASQLAAVLSKLQTLYSDHASVVSMNLFVALLCASIVIGHLLEENRWMNESITALAIGLCTGVVILLTSGGKSSRLLVFSEDLFFIYLLPPIIFNAGFSVKKKQFFRNFITIMLFGAVGTLISWSIISFGVIKFFKEMDIGSLEIGDFLAIGAIFAATDSVCTLQVLNQDETPLLYSLVFGEGVVNDATSVVLFNAIQSFDLTNTNHRIALEFIGSFLYLFLASTLLGVAVGLVSAYIIKTLYFGRHSTDREFALMMLMAYLSYIMAELFYLSGILTVFFCGIVMSHYTWHNVTESSRITSKHAFATLSFVCETFIFLHVGMDALDIETWKFVNDRPGTSIIVSSVLLALVMAGRAAFVFPLSFLSNLAHKSANEKISFRQQIIIWWAGLMRGAVSMA…
>GhNHX5
MVASQLAAVLSKLQTLYSDHASVVSMNLFVALLCASIVIGHLLEENRWMNESITALAIGLCTGVVILLTSGGKSSRLLVFSEDLFFIYLLPPIIFNAGFSVKKKQFFRNFITIMLFGAVGTLISWSIISFGVIKFFKEMDIGSLEIGDFLAIGAIFAATDSVCTLLVLNQDETPLLYSLVFGEGVVNDATSVVLFNAIQSFDLTNTNHRIALEFIGSFLYLFLASTLLGVAVGLVSAYIIKTLYFGRHSTDREFALMMLMAYLSYIMAELFYLSGILTVFFCGIVMAHYPWLNVTESSRITSKHAFATLSFVCETFIFLHVGMDALDIETWKFVNDRPGTSIIVSSVLLALVMAGRAAFVFPLSFLSNLAHKSANEKISFRQQIIIWWAGLMRGAVSMA…
>GhNHX6
MVASQLAVVFSKLQTLFTSDHASVVSLNLFVALLCACIVIGHLLEENRWMNESITALVIGLCTGVIILWRSGGKSSRLLVFSEDLFFIYLLPPIIFNAGFKVKKKQFFRNFITIMMFGAIGTLISCTVISLGATYMFKEMDFGSLDIGDFLAIGAIFAATDSVCTLQVLHQDETPLLYSLVFGEGVVNDATSIVLFNAIQSFDLSDINFRIALKSIGKFFYLFSASTMLGVFVGLASAYIIKMLYFGRHSTDREFALMMLMAYLSYILAELFYLSGILTVFFCGIVMSHYTWHNVTESSRVTTKHTFATLSFVAETFIFLYVGMDALDISTWRVNDRPRTSLMVSSILLALVMAGRAAFVFPLSYLANLSNKSSSENISFREQIIIWWAGLMRGAVSMA…
>GhNHX7
MAIGILSTLLAKSETILGSGHSSVVSMNLFVALLCGCIVIGHLLEESRWMNESITALAIGLCTGIVILLTTGGKSSHLLVFSEDLFFNYLLPPIIFNAGFQVKKKQFFRNFMTIMLFGAVGTLISFAIISLGAIHFFKKMSIGNLKIGDYLAIGAIFSATDSVCTLQVLNQDDTPLLYSLVFGEGVVNDATAVVLFKAIQSFDLPHINTTIALQFVGNFLYLFISSTLLGVLAGLLSAYIIKKLYFGRHSTDREVALMILMAYLSYMLAEFFYLSAILTVFFCGIVMSHYTWHNVTESSRVTTKHAFATLSFVAEIFIFLYVGMDALDIEKWRVVSDSPGKSVGVSAILLGLILVGRAAFVFPLSSISNLTKKAPSDKIDFKQQVTIWWAGLMRGAVSM…
>GhNHX8
MTIGIISFALANSETTFASDHGPIVSINLFVALLCGCIVIGHLLEENRWMNESITALAIGVCTGVIILLTTGGKSSRLLVFSEDLFFIYLLPPIIFNAGFQVKKKQFFRNFMTIMLFGAVGTLISFCVISIGAIHFFQKMNIGDLTLGDYLAIGAIFSATDSVCTLQVLNQDETPLLYSLVFGEGVVNDATSVVLFNAIQTFDLSHINSTMALQYIGNFLYLFILSTLLGVLAGLLSAYIIRKLYFGRYSTDREVALMMLMAYLSYMLAELFSFSAILTVFFCGIVMSHYTWHNVTESSRVTTKHAFATLSFVSEIFIFLYVGMDALDIEKWRVISDSNSKNIGVSGILLGLILVGRAAFVFPLSVISNLTRKAPHEKVDFKQQVTVWWAGLMRGAVSM…
>GhNHX9
MTIGIISFALANSETTFASDHGPIVSINLFVALLCGCIVIGHLLEENRWMNESITALAIGVCTGVIILLTTGGKSSRLLVFSEDLFFIYLLPPIIFNAGFQVKKKQFFRNFMTIMLFGAVGTLISFCVISIGAIHFFQKMNIGDLTLGDYLAIGAIFSATDSVCTLQVLNQDETPLLYSLVFGEGVVNDATSVVLFNAIQTFDLSHINSTMALQYIGNFLYLFILSTLLGVLAGLLSAYIIRKLYFGRYSTDREVALMMLMAYLSYMLAELFSFSAILTVFFCGIVMSHYTWHNVTESSRVTTKHAFATLSFVSEIFIFLYVGMDALDIEKWRVISDSNSKNIGVSGILLGLILVGRAAFVFPLSVISNLTRKAPHEKVDFKQQVTVWWAGLMRGAVSM…
>GhNHX10
MSTIEIETMSHLSTLQSSSDFLSTTTIIALTIFFSLLCACIIIGHLLEENRWANESITALLLGLCAGAVVLLASKGNSSKILVFSEDLFFLYLLPPIIFNAGFQVKKKQFFKNFTIILMFGIFGTVISFCLISVGAFLLFNRIGVTSLNTQDYLAVGAILSATDTVCTLQVLSQDETPFLYSVIFGEGVVNDATSIVLFNAVQSLDFNNIDAMISLKLLGTFLYLFFTSTILGVVAGLLSAFIIKTLYFGRHSTDREVALMMIMAYLSYMLAELLNLSGILTVFFCGIVMSHYTWHNVTQSSRITTKHAFATMSFIAETFIFLYVGMDALDIDKWKASSASAGTFIAVSSTLFALVLVGRAAFVYPLANFINCIRKRDGSNIAFRKQFIMWWAGLMRGA…
>GhNHX11
MLFGAVGTLISCTIISLGVINFFKEMDIGSLDIGDFLAIGAIFAATDSVCTLQVLNQDETPLLYSLVFGEGVVNDATSVVLFNAIQSFDLVNTSPRILLEFIGSFLYLFLASTMLGVIVGLVSAYIIKKLYFGRHSTDREFALMMLMAYLSYIMAELFYLSGILTVFFCGIVMSHYTWHNVTESSRVTTKHAFATLSFVAETFLFLYVGMDALDMEKWRFVSDSPGTSVAVSAVLMGLVMVGRAGFXXXXXXXRAAFVFPLSFLSNLAKKSTSEKISFREQIIIWWAGLMRGAVSMALAYNQFTRGGHTQLRGNAIMITSTITIVLFSTVVFGLMTKPLIRFLLPHPKPTASMLSDQSTPKSMEAPFLGSGQDSFDDSLIGVHRPNSIRALLTTPAHTV…
>GhNHX12
MSHLSTLQSSSDFLSTTTIIALTIFFSLLCACIIIGHLLEENRWANESITALLLGLCAGAVVLLASKGNSSKILVFSEDLFFLYLLPPIIFNAGFQVKKKQFFKNFTIILMFGIFGTVISFCLISVGAFLLFNRIGVTSLNTQDYLAVGAILSATDTVCTLQVLSQDETPFLYSVIFGEGVVNDATSIVLFNAVQPLDFNNIDAMISLKLLGIFLYLFFTSTILGVVAGLLSAFIIKTLYFGRHSTDREVALMMIMAYLSYMLAELLNLSGILTVFFCGILMSHYTWHNVTQSSRITTKHAFATMSFIAETFIFLYVGMDALDIDKWKASSASAGTFIAVSSTLFALVLVGRAAFVFPLANFINCIRRRDGSNIAFRKQFIMWWAGLMRGAVTIALSYN…
>GhNHX13
MLFGAVGTLISFGIISAGAIQFFKELHIGDLQIGDYLAIGAIFTATDSVCTLQVLNQDETPLLYSLVFGEGVVNDATSVVLFNAIQSFDLTHINSTIALKFVGNFFYLFISSTLLGVVTGLLSAFIIKKLYFGRHSTDREVALMILMAYLSYMLAELFYLSGILTVFFCGIVMSHYTWHNVTESSRVTTKHAFATLSFVAEIFIFLYVGMDALDIEKWRVISDSPGKSVGVSSILLGLILVGRAGFVFPLSFISNLTKKAPHEKIEFKQQVTIWWAGLMRGAVSMALAYNQFTSLGHTQVRGNAMMITSTITVVLFSTVVFGLMTKPLVRILVPCPKRLSRMLSSEPTTPKSFFLPLLDNGQGSEAEQGNRSVVRPSSLRMLLTTPSHTVHYYWRKFDD…
>GhNHX14
MTIMLFGAVGTLISFAIISLGAIHFFKKMSIGNLKIGDYLAIGAIFSATDSVCTLQVLNQDDTPLLYSLVFGEGVVNDATAVVLFKAIQSFDLPHINTTIALQFVGNFLYLFISSTLLGVLAGLLSAYIIKKLYFGRHSTDREVALMILMAYLSYMLAEFFYLSAILTVFFCGIVMSHYTWHNVTESSRVTTKHAFATLSFVAEIFIFLYVGMDALDIEKWRVVSDSPGKSVGVSAILLGLILVGRAAFVFPLSSISNLTKKAPCDKIDFKQQVTIWWAGLMRGAVSMALAYNQFTSLGHTQLRGNAMMITSTITVVLFSTVVFGLMTKPLIRILLPSPKNRMLSSEPSTPKSLTVPLLTNGHDLEAYESDRNLITRPTSLRMFLSTPSNTVHYYWRKF…
>GhNHX15
MFEFVRNLAHEHEQVVPISVFVAILCLCLVIGHLLEENRWVNESITAILIGGIAGTVILFLNKGKSSHILRFSEELFFIYLLPPIIFNAGFQVKKKQFFQNFITIMLFGVIGVFISTSIITAGSWWLFPKLGFFGLTAREYLAVGTIFSSTDTVCTLQVLHQDENPLLYSLVFGEGVVNDATSVVLFNAIQKIDVSRINSRTSFQLIGDFIYLFSTSTALGVTFGLVTAYSLKTLYFGRHSTVRELAIMVLMAYLSYMLAELLDLSRILTVFFCGILMSHYAWYNVTESSRITTRHIFAMMSFVAETFIFLYVGMDALDMEKWKMTRLSVGTLMASFGTLVFLILVGRAAFVFPLSAFSNCLNKHPDRSKPLTFRHQVVIWWAGLMRGAVSIALAFKQF…
>VvNHX1
MMASQFGSMLTRLGNLSTSDHASVVSINLFVALLCGCIVIGHLLEENRWVNESITALVIGVCTGVVILLTSGGRSSHLLVFSEDLFFIYLLPPIIFNAGFQVKKKQFFRNFITIMLFGAVGTLISCGIITSGVMQFFSKLDIGSFDIGDYLAIGAIFSATDSVCTLQVLNQDETPLLYSLVFGEGVVNDAASVVLFNAIQSFDLTHTNLRIALQFIGNFFYLFFTSTMLGVVAGLLSAYIIKTLYFGRHSTDREVALMMLMAYLSYILAELFYLSGILTVFFCGIVMSHYTWHNVTESSRVTTKHAFATLSFVAEIFIFLYVGMDALDIEKWRFVSKTPGTSVAVSSILIGLVLVGRAAFVFPLSFLSNLAKKNPTEKITFRQQVIIWWAGLMRGAVSV…
>VvNHX2
MGFELGSVVMKLGMVSTSDHSSVVSMNLFVALLCACIVVGHLLEEYRWMNESITALALGLCTGIIILLTTRGKSSHILVFSEDLFFIYLLPPIIFNAGFQVKKKQFFRNFMTIMLFGAIGTLISFGIISLGAIHFFKKMKIGSLDIGDYLALGAIFSATDSVCTLQVLNQDETPLLYSLVFGEGVVNDATSVVLFNAIQSFDLSHIDSSIALQFIGNFLYLFITSTMLGVFAGLLSAYIIKKLYFGRHSTDREVAIMILMAYLSYMLAELFYLSAILTVFFCGIVMSHYTWHNVTESSRVTTKHAFATLSFVAEIFIFLYVGMDALDIEKWRFVSDSPGKSIGVSSILLGLVLVGRAAFVFPLSFLSNLTKKSSSEKIHIKQQVTIWWAGLMRGAVSMA…
>VvNHX3
MGFELGSVVMKLGMVSTSDHSSVVSMNLFVALLCACIVVDHWLEEYRWMNESITALALGLCTGIIILLTTRGKSSHILVFSEDLFFIYLLPPIIFNAGFQVKKKQFFRTFMTIMLFGAIGTXISFGIISLGAIHFFKKMKIGSXDIEDXLALGXIFSATDSVCTLQVLNQDETPLLYSLVFGEGVVNDATSVVLFNAIQSFDLSHIDSSIALQFIGNFLYLFITSTMLGVFAGLLSAYIIKKLYFGRHSTDREVAIMILMAYLSYMLAELFYLSAILTVFFCGIVMSHYTWHNVTESSRVTTKHAFATLSFVAEIFIFLYVGMDALDIEKWRFVSDSPGKSIGVSSILLGLVLVERAAFVFPLSFLSNLTKKSSSEKIHIEQQVTIWWAGLMRGAVSMA…
>VvNHX4
MGLNSLAGLGMRSTSDQVSIDAITLFVALLCACIVIGHLLEEYRWMNESITALFIGLCTGIVLLLTTGGKISLILLFNEELFFIYLLPPIIFNAGFQVKKKQFFRNFMTIILFGAIGTLISFGIISLGAIQLFKKLDIGFLEIGDYLAIGAIFSATDSVCTLQVLNQDETPLLYSLVFGEGVVNDATSVVLFNAIQRFDLSHITSGIAFQFVGNFLSLFFASTLLGVFIGLLSAYIMKKLYFGRHSTDREVALMIVMAYLSYIMAELFYLSGILTVFFCGIVMSHYTWHNVTESSRVTTKHTFATLSFVSEIFIFLYVGIDALDIEKWRVVSNSPGTSIGVSSILLGLVLIGRAAFVFPLSFLSNLTKKSESDKIGFKQQITIWWAGLMRGAVSVALAY…
>VvNHX5
MGFLDAIPNKHSLQDSSSFLNTTTVIALCLFFALLCACIVIGHLLEEHRWANESITALLLGLCAGVVVLLVSKGRSSKILAFNEDLFFLYLLPPIIFNAGFQVKKKQFFKNFSIILMFGVFGTIISFCLISAGAFLLFKKIGITTLNIEDYLAVGAILSATDSVCTLQVLNQEETPFLYSVVFGEGVVNDATSIVIYNAVQSLDLSNIDALTALKLLGTFLYLFFTSTILGVVAGLLSAYIIKTLYFGRHSTDREVALMMIMAYLSYMLAELLSLSGILTVFFCGIVMSHYTWHNVTESSRITTKHAFATISFIAETFIFLYVGMDALDIDKWRSSKASAGTSVSVSSAFLALVLIGRAAFVFSLSNILNFFKSAESTKVEFRQQFIIWWAGLMRGAVT…
>VvNHX6
MSASGFAMNIAGDHAQVVLISVFVAVLCLCLVIGHLLEENRWLNESTTAIIIGCITGTIILLLSKGKSSHILRFNEELFFIYLLPPIIFNAGFQVKKKQFFQNFITIMLFGVIGVFISSSIITAGAWWLFPRFGFTGLSAQDYLAIGTIFSSTDTVCTLQVLHQDETPLLYSLVFGEGVVNDATSVVLFNAVQKLDKSKLNGWAALRVLLDSLYLFSTSTALGVVAGLLTAYTLKTLYIGRHSTVREIALMVLMAYLSYTLAELFHLSGILTVFFCGILMSHYASHNVTQSSRITTRHIFATMSFIAETFIFLYVGIDALDIEKWKLSKLSFRTSVGIYSTVVLLISLGRAAFVFPLSTFSNYVHRRADRLSSISFKHQVIIWWAGLMRGAVSIALAFK…
>VvNHX7
MGSVLEGVFPYRALGEESSSSSSNPTDAVIFVGICLVMGIACRQLLRGTRVPYTVALLILGIALGSLEHGTSNKLGKIGDGIRLWANIDPNLLLAVFLPALLFESSFSMEVHQIKRCMVQMLILAGPGVLVSTFCLGSALKFTFPYDWSWKTSLLLGGLLSATDPVAVVALLKELGAGKKLSTIIEGESLMNDGTAIVVYQLFYQMVLGKSFNFGAVVKFLTQVSLGAVGIGLAFGLASVLWLGFIFNDTVIEITLTLAVSYIAYFTAQEGADVSGVLAVMTLGMFYAAVAKTAFKGGGQQSLHHFWEMVAYIANTLIFILSGVVIAEGVLGSNDIFKNHGNSWGYLILLYVYVQVSRIVVVGVSYPFLWYFGYGLDWKEAIILIWSGLRGAVALSLSL…
>VvNHX8
MMAIVVYQLFYQMVLGKSFNFGAVVKFLTQVSLGAVGIGLAFGLASVLWLGFIFNDTVIEITLTLAVSYIAYFTAQEGADVSGVLAVMTLGMFYAAVAKTAFKGDGQQSLHHFWEMVAYIANTLIFILSGVVIAEGVLGSNDIFKNHGNSWGYLILLYVYVQVSRIVVVGVSYPFLWYFGYGLDWKEAIILIWSGLRGAVALSLSLSVKRASDSSSYLSSETGTLFVFFTGGIVFLTLIVNGSTTQFILHLLNMDKLSEVKRRILDYTKYEMLNKALEAFGDLGDDEELGPADWPTVKRYIASLNDVEGGLVHPHTVYESDNNLYPTNLKDIRIRLLNGVQAAYWRMLDEGRITQTTANLLMQSVDEALDLVSDEPLCDWKGLKANVNFPNYYRFLQTS…
>EhNHX1
MAMLASYFDSFISKMPSLSTSDHASVVSLNLFVALLCACIVLGHLLEENRWMNESITALLIGLATGVVILLISKGKSSHLLVFSEDLFFIYLLPPIIFNAGFQVKKKQFFRNFVTIMLFGAIGTVISCTVITLGVTQFFKKLDIGTFDLGDYLAIGAIFAATDSVCTLQVLNQDETPLLYSLVFGEGVVNDATSVVVFNAIQSFDLTHLNHEAAFHLLGNFLYLFLLSTLLGVATGLISAYVIKKLYFGRHSTDREVALMMLMAYLSYMLAELFDLSGILTVFFCGIVMSHYTWHNVTESSRITTKHTFATLSFLAETFIFLYVGMDALDIDKWRSVSDSPGTSVAVSSILIGLLMLGRAAFVFPLSFLSNLAKKNESEKINFKMQVVIWWAGLMRGAV…
>EhNHX2
MAMLASYFDSFISKMPSLSTSDHASVVSLNLFVALLCACIVLGHLLEENRWMNESITALLIGLATGVVILLISKGKSSHLLVFSEDLFFIYLLPPIIFNAGFQVKKKQFFRNFVTIMLFGAIGTVISCTVITLGVTQFFKKLDIGTFDLGDYLAIGAIFAATDSVCTLQVLNQDETPLLYSLVFGEGVVNDATSVVVFNAIQSFDLTHLNHEAAFHLLGNFLYLFLLSTLLGVATGLISAYVIKKLYFGRHSTDREVALMMLMAYLSYMLAELFDLSGILTVFFCGIVMSHYTWHNVTESSRITTKHTFATLSFLAETFIFLYVGMDALDIDKWRSVSDSPGTSVAVSSILIGLLMLGRAAFVFPLSFLSNLAKKNESEKINFKMQVVIWWAGLMRGAV…
>EhNHX5
MATVIEAVMPYRLLEDETGSPEGESSPVDAVLFVGMSLVLGIASGHLLRGTRVPYTVALLVIGIALGSLEYGTHHNLGKLGHGIRIWNEINPELLLAVFLPALLFESAFSMEVHQIKRCLGQMVLLAGPGVLISTFCLASLVKLTFPYDWDWKTSLLLGGLLSATDPVAVVALLKELGASKKLSTVIEGESLMNDGTAIVVFQLFLKMVMGHSSGWSSIITFLIRVALGAVGIGIAFGIASVLWLKFIFNDTVIEITLTIAVSYFAYYTAQEWAGASGVLTVMTLGMFYAAFARTAFKGDSQRSLHHFWEMVAYIANTLIFILSGVVIAEGILDSDKIAYQGSSWGYLFLLYLYIQLSRCVVVGVLYSFLCRVGYGLDWKEAIILVWSGLRGAVALSLS…
>EhNHX3
MATVIEAVMPYRLLEDETGSPEGESSPVDAVLFVGMSLVLGIASRHLLRGTRVPYTVALLVIGIALGSLEYGTHHNLGKLGHGIRIWNEINPELLLAVFLPALLFESAFSMEVHQIKRCLGQMVLLAGPGVLISTFCLASLVKLTFPYDWDWKTSLLLGGLLSATDPVAVVALLKELGASKKLSTVIEGESLMNDGTAIVVFQLFLKMVMGHSSGWSSIITFLIRVALGAVGIGIAFGIASVLWLKFIFNDTVIEITLTIAVSYFAYYTAQEWAGASGVLTVMTLGMFYAAFARTAFKGDSQRSLHHFWEMVAYIANTLIFILSGVVIAEGILDSDKIAYQGSSWGYLFLLYLYIQLSRCVVVGVLYSFLCRVGYGLDWKEAIILVWSGLRGAVALSLS…
>EhNHX4
MATVIEAVMPYRLLEDETGSPEGESSPVDAVLFVGMSLVLGIASRHLLRGTRVPYTVALLVIGIALGSLEYGTHHNLGKLGHGIRIWNEINPELLLAVFLPALLFESAFSMEVHQIKRCLGQMVLLAGPGVLISTFCLASLVKLTFPYDWDWKTSLLLGGLLSATDPVAVVALLKELGASKKLSTVIEGESLMNDGTAIVVFQLFLKMVMGHSSGWSSIITFLIRVALGAVGIGIAFGIASVLWLKFIFNDTVIEITLTIAVSYFAYYTAQEWAGASGVLTVMTLGMFYAAFARTAFKGDSQRSLHHFWEMVAYIANTLIFILSGVVIAEGILDSDKIAYQGSSWGYLFLLYLYIQLSRCVVVGVLYSFLCRVGYGLDWKEAIILVWSGLRGAVALSLS…
>SoNHX1
MWSQLSSLFSSNMDSLGTSDHASVVSMNLFVALICGCIVIGHLLEENRWMNESITALLIGLATGVIILLISGGKSSHLLVFSEDLFFIYLLPPIIFNAGFQVKKKQFFRNFITIILFGAIGTLVSFTIISLGAMSIFKKLDIGSLELADYLAIGAIFAATDSVCTLQVLNQDETPLLYSLVFGEGVVNDATSVVLFNAIQSFDLTRFDHTIALKFMGNFLYLFITSTLLGAFTGLLSAYIIKKLYFGRHSTDREVALMMLMAYLSYMLAELFYLSGILTVFFCGIVMSHYTWHNVTESSRVTTKHAFATLSFVAEVFLFLYVGMDALDIEKWRFVSDSPGTSVAVSSILLGLVMVGRAAFVFPLSWLMNFSKKSHSDKVTLNQQVVIWWAGLMRGAVSI…
>SoNHX2
MFGVAKKLHESTPFDTSTVISITVFISLICLCIIIGHLLEKNRWANESIASLLLGIVSGGVVLLIHKGQNSRILVFNEELFFIYLLPPIIFNAGFQVKKKQFFKNFSTILSFGVLGTLISFCLVSSGVLFLLKKIGLTQLSTNDYLALGAILSATDSVCTLQVLNQDDTPLLYSIVFGEGVVNDATSIVLFNAVQSLDLSNLSSMTALALLGTFLYLFVTSTLLGVFVGLLSAFIIKKLYIGRHSTDREIALMMLMAYLSYMIAELMDLSGILTVFFCGVVMSHYTWHNVSESSRITAKHAFATMSFISETFIFLYVGMDTLDIDKWKESSSSAGTYLAVSSAMLALVLIGRAAFIFPLASILNYMKRDSDKKIDLSTQFIVWWAGLMRGAVTVALSYN…
>SoNHX3
MSRKGLCPVSSAYNWKQMLTVFTVHMLHIKLIKCVYSAKMMRDDEYSTLVSSTPYGRSISRANDYEDTEKFVWPWKGIVANFPVELENGVYVGKSGNKLLGETVVNGLDPWKVITLWSPQGHTGFTVVNFGKDIMGFKNARLFEKDFELNGQGRRDWYSTKARGDKLFGWLAREEDYISNSPLGKHLRDNGNLKTFADIKNEKEWMEKVPSSSLDQTIQVKDKQKTEMVNNLWGKHLRDNGDLRTFSIIKNEESMEKSLFSSVNQSIHVKDKQKIEVLSETCASLEEVMKETDKMTHTFNTEMERMWKQIVDDKEKILSEHENFMRKLRSQIYELEKHEKLSERREADFEDKIIKLQQQRKLKPFSPLVTEHSTLNTANLASVHAISLFVVLLCICILI…
>SoNHX4
MVLDLGVLWEKGVAIANMGESGHAQVVPISVFVAVLCLCLVIGHLLEENRWVNESITAILIGCLTGTIILLISKGKNSHILRFDEELFFIYLLPPIIFNAGFQVKKKQFFQNFLTIMLFGVIGVFISTTIISLGSWWLLPKVGFAGLTARDYLAIGTIFSSTDTVCTLQVLNQDETPLLYSLVFGEGVVNDATSVVLFNAIQKINVKRVGDWTHVLGSFLYLFFASTALGITTGLLTAYALKALYFGRHSTDREIALMTLMAYLSYTLAELAELSGILTVFFCGIVMSHYAWYNITEKSRITTRHIFATMSFISETFIFLYVGTDVFDMQKWKMTKLSFRTLVAIYATIIFLILIARAAFVFPLSILSNLMNREKEITGKRSSITFKKQVIVWWAGLMR…
>SoNHX5
MAAYRIAVPFPLMLAEVEPASSAATTSMNTTSAAALAEESASNPSDAVIFFGVSLVLGIACRHFLRGTRVPYTVALLIIGIGLGSLEYGTKHGVGRFGDGIRIWENIDPELLLAVFLPALLFESSFSMEIHQIKRCAAQMVILAGPGVLISTFCLGAALKFSFPYDWNWKTSLLLGGLLSATDPVAVVALLKELGASKKLSTIIEGESLMNDGTAIVVYQLFYQMVLGRSFNWASILKYLVQVSFGAVGFGIAFGVASVLWLGFIFNDTVIEITLTLAVSYVAYFTAQEGADVSGVLTVMTLGMFYAAAARTAFKGESQQSLHHFWEMVAYIANTLIFILSGAVIAQGVLSSDNIFQNHGIAWGYLILLYVYVLVARGVVVGVLFPFLRYFGYGLDWKE…
>SeNHX1
MLSQLSSLFYSKMDMLSTSDHASVVSMNLFVALLCGCIVIGHLLEENRWMNESITALLIGLCTGVVILLISGGKSSHLLVFSEDLFFIYLLPPIIFNAGFQVKKKQFFRNFITIIMFGAIGTLVSFSVISLGAMTIFKKMDIGSLELGDYLAIGAIFAATDSVCTLQVLNQDETPLLYSLVFGEGVVNDATSVVLFNAIQNFDLTNIDHRIAIQFSGNFLYLFFASTMLGAMTGLLSAYVIKKLYFGRHSTDREVALMMLMAYLSYMLAELFYLSGILTVFFCGIVMSHYTWHNVTESSRVTTKHAFATLSFVAEIFLFLYVGMDALDIEKWRFVSDSPGTSVAVSSILLGLLMVGRAAFVFPLSLLINFSKKSHSEKITFNQQIVIWWAGLMRGAVSM…
>AtNHX1
MLDSLVSKLPSLSTSDHASVVALNLFVALLCACIVLGHLLEENRWMNESITALLIGLGTGVTILLISKGKSSHLLVFSEDLFFIYLLPPIIFNAGFQVKKKQFFRNFVTIMLFGAVGTIISCTIISLGVTQFFKKLDIGTFDLGDYLAIGAIFAATDSVCTLQVLNQDETPLLYSLVFGEGVVNDATSVVVFNAIQSFDLTHLNHEAAFHLLGNFLYLFLLSTLLGAATGLISAYVIKKLYFGRHSTDREVALMMLMAYLSYMLAELFDLSGILTVFFCGIVMSHYTWHNVTESSRITTKHTFATLSFLAETFIFLYVGMDALDIDKWRSVSDTPGTSIAVSSILMGLVMVGRAAFVFPLSFLSNLAKKNQSEKINFNMQVVIWWSGLMRGAVSMALAY…
>AtNHX2
MTMFASLTSKMLSVSTSDHASVVSLNLFVALLCACIVIGHLLEENRWMNESITALLIGLGTGVVILLISRGKNSHLLVFSEDLFFIYLLPPIIFNAGFQVKKKQFFRNFVTIMAFGAIGTVVSCTIISLGAIQFFKKLDIGTFDLGDFLAIGAIFAATDSVCTLQVLNQDETPLLYSLVFGEGVVNDATSVVLFNAIQSFDLTHLNHEAAFQFLGNFFYLFLLSTGLGVATGLISAYVIKKLYFGRHSTDREVALMMLMAYLSYMLAELFALSGILTVFFCGIVMSHYTWHNVTESSRITTKHAFATLSFLAETFIFLYVGMDALDIEKWRFVSDSPGTSVAVSSILMGLVMLGRAAFVFPLSFLSNLAKKHQSEKISIKQQVVIWWAGLMRGAVSMAL…
>AtNHX3
MSIGLTEFVTNKLAAEHPQVIPISVFIAILCLCLVIGHLLEENRWVNESITAILVGAASGTVILLISKGKSSHILVFDEELFFIYLLPPIIFNAGFQVKKKKFFHNFLTIMSFGVIGVFISTVIISFGTWWLFPKLGFKGLSARDYLAIGTIFSSTDTVCTLQILHQDETPLLYSLVFGEGVVNDATSVVLFNAVQKIQFESLTGWTALQVFGNFLYLFSTSTLLGIGVGLITSFVLKTLYFGRHSTTRELAIMVLMAYLSYMLAELFSLSGILTVFFCGVLMSHYASYNVTESSRITSRHVFAMLSFIAETFIFLYVGTDALDFTKWKTSSLSFGGTLGVSGVITALVLLGRAAFVFPLSVLTNFMNRHTERNESITFKHQVIIWWAGLMRGAVSIAL…
>AtNHX4
MVIGLSTMLEKTEALFASDHASVVSMNLFVALLCACIVLGHLLEETRWMNESITALIIGSCTGIVILLISGGKSSRILVFSEDLFFIYLLPPIIFNAGFQVKKKQFFRNFMTIMLFGAIGTLISFVIISFGAKHLFEKMNIGDLTIADYLAIGAIFSATDSVCTLQVLNQDETPLLYSLVFGEGVVNDATSVVLFNAIQRFDLTNINSAIALEFAGNFFYLFILSTALGVAAGLLSAFVIKKLYIGRHSTDREVALMMLLAYLSYMLAELFHLSSILTVFFCGIVMSHYTWHNVTDKSKVTTKHTFAAMSFLAEIFIFLYVGMDALDIEKWDVVRNSPGQSIGVSSILLGLILLGRAAFVFPLSFLSNLTKSSPDEKIDLKKQVTIWWAGLMRGAVSMA…
>AtNHX5
MEEVMISPVEHDPQGQVKQQQAAGVGILLQIMMLVLSFVLGHVLRRHRFHYLPEASGSLLIGLIVGILANISDTETSIRTWFNFHEEFFFLFLLPPIIFQSGFSLQPKPFFSNFGAIVTFAIIGTFVASVVTGGLVYLGGSMYLMYKLPFVECLMFGALISATDPVTVLSIFQDVGTDVNLYALVFGESVLNDAMAISLYRTMSLVNRQSSSGEHFFMVVIRFFETFAGSMSAGVGVGFTSALLFKYAGLDTENLQNLECCLFVLFPYFSYMLAEGVGLSGIVSILFTGIVMKRYTFSNLSEASQSFVSSFFHLISSLAETFTFIYMGFDIAMEQHSWSHVGFILFSILFIGVARAVNVFGCAYLVNLFRQENQKIPMKHQKALWYSGLRGAMAFALAL…
>AtNHX6
MSSELQISPAIHDPQGQEKQQQAAGVGILLQIMMLVLSFVLGHVLRRHKFYYLPEASASLLIGLIVGGLANISNTETSIRTWFNFHDEFFFLFLLPPIIFQSGFSLQPKPFFSNFGAIVTFSVLGTFVASMVTGLLVYLGGVMFLMYRLPFVECLMFGSLISATDPVTVLSIFQELGSDVNLYALVFGESVLNDAMAISLYRTMSLVRSHSSGQNFFMVIVRFLETFVGSMSAGVGVGFTSALLFKYAGLDVDNLQNLECCLFVLFPYFSYMLAEGLSLSGIVSILFTGIVMKHYTYSNLSANSQRFVSAFFHLISSLAETFVFIYMGFDIAMEKHSWSHLGFIFFSILFIVIARAANVFGCGYLVNLARPAHRKIPMTHQKALWYSGLRGAMAFALAL…
>AtHNX7
MTTVIDATMAYRFLEEATDSSSSSSSSKLESSPVDAVLFVGMSLVLGIASRHLLRGTRVPYTVALLVIGIALGSLEYGAKHNLGKIGHGIRIWNEIDPELLLAVFLPALLFESSFSMEVHQIKRCLGQMVLLAVPGVLISTACLGSLVKVTFPYEWDWKTSLLLGGLLSATDPVAVVALLKELGASKKLSTIIEGESLMNDGTAIVVFQLFLKMAMGQNSDWSSIIKFLLKVALGAVGIGLAFGIASVIWLKFIFNDTVIEITLTIAVSYFAYYTAQEWAGASGVLTVMTLGMFYAAFARTAFKGDSQKSLHHFWEMVAYIANTLIFILSGVVIAEGILDSDKIAYQGNSWRFLFLLYVYIQLSRVVVVGVLYPLLCRFGYGLDWKESIILVWSGLRGA…
>AtNHX8
MTSIIGAALPYKSPEKAIASSSYSAENDSSPVDAVIFAGTSLVLGTACRYLFNGTRVPYTVVLLVIGIFLGSLEYGTKHNLGKLGHGIRIWNGINPDLLLAVFLPVLLFESSFSMDVHQIKRCMGQMVLLAGPGVLISTFCLGALIKLTFPYNWDWKTSLLLGGLLGATDPVAVVALLKELGASKKMTTLIDGESLMNDGVSVVVFQLFFKMVMGHNSDWGSIIKFLVQNSFGAVGIGLAFGIASVFWLKFIFNDTVAQITVTLSASYFAYYTAQEWAGVSGILTVMILGMFFAAFARTAFKGDSHQSLHHFWEMAAYIANTLVFMLSGVIIAESVLSGQTISYKGNSWSFLFLLYLYVQLSRCVVVGVLYPLLCRSGYGLDWKESIILTWSGLRGAVS…
>HvNHX1
MAFEVVAAQLARLSDALATSDHASVVSINLFVALLCACIVLGHLLEENRWLNESITALIIGLCTGVVILMTTKGKSSHVLVFSEDLFFIYLLPPIIFNAGFQVKKKQFFRNFMTITLFGAVGTMISFFTISLAAIAIFSKMNIGTLDVSDFLAIGAIFSATDSVCTLQVLNQDETPFLYSLVFGEGVVNDATSVVLFNALQNFDPNQIDAIVILKFLGNFCYLFVSSTFLGVFSGLLSAYIIKKLYIGRHSTDREVALMMLMAYLSYMLAELLDLSGILTVFFCGIVMSHYTWHNVTESSRVTTKHAFATLSFIAETFLFLYVGMDALDIEKWKFASDSPGKSIGISSILLGLVVGRAAFVFPLSFLSNLTKKTELEKISWRQQIVIWWAGLMRGAVSI…
>HvNHX2
MAAASLWDELVVAASTGGSSGTVVSICVFTAVLCLCLVASHLLEENKWVNESITALIIGCIVGALIFLLSKGRNSHILRFDEQLFFIYVLPPIIFNAGFQVKKKQFFHNFLTIMSFGVFGVFISVAIVSAGFYWLLPKVGFGRLDAVDYLALGVIFSSTDTVCTLQVISQDETPRLYSLVFGEGVVNDATSVVLFNAIKNMDITKLKGGAVLKVIGDFLYLFATSTILGATIGLFTAYVLKALYFGRHSTDREVALMALMAYLSYMLAELLSLSGILTVFFCGIVMSHYAWHNVTESSRITTRHIFATLSFIAETFIFLYVGMDALDLDKWKTTQASLETSVGIFGVIISLILLGRAAFVFPLSILSNFMSGNSEKAPITFKHQVVIWWAGLMRGAVSI…
>HvNHX3
METAAHYAAAPHQGAMPGFGGAVDEQQAAGVGILLQISMLVLSFVLGHLLRRRKFYYLPEASASLLIGMIVGGFANISNTQKSTRRWFNFREDFFLLFLLPPIIFQSGFNLAPKPFFSNFGAIITFAILGTFIASIVTGLLVYLAGLIFIIYRLPLVECMMFGALVSATDPVTVLSIFQELGTDVNLYALVFGESVLNDAVAISLYRTMASMRTSSSGQNLLIVILRFLENFVGSMSSGIGVGLISALLFKYAELGVENLHNLESCLFVLFPYFSYMLAEGLGLSGIVSILFTGIVMKRYTFYNLSEDSQRFTARFFHLLSSLAEAFIFIYMGFDIAMERQSWSHIGFIFFSIVFILVARAANVFSCAYILNLARPPHSQIPREYQLALWYSGLRGAMA…
>HvNHX4
MAMELSMALAAPPGGGLLAPPPPAPPGKEQQVAGVGILLQISMLVLSFVLGHVLRRHRFYYLPEASASLLIGLVVGGLANISNTETNTRTWFNFHEEFFFLFLLPPIIFQSGFSLSPKPFFANFGAIVTFAILGTFIASIVTGMLVYLGGLTFLMYKLPLVECLMFGALISATDPVTVLSIFQELGSDVNLYALVFGESVLNDAMAISLYRTMSSVRSNAAGGENIFMMILQFLEIFVGSMSSGVGVGFISSLLFKYAGLDIDNLQNLECCLFVLFPYFSYMLAEGLGLSGIVSILFTGMVMKHYTYSNLSDNSQRFVSAFFHLLSSLAETFVFIYMGFDIAMEEHSWSHVGFIIFSIIFIIVARAANVFSCAYLVNISRPEHRRIPLNHQKALCFSGL…
>BvNHX1
MMEQLSSVFFSKMNSLSTSDHASIVSMNLFVALLCGCIVLGHLLEENRWMNESITALLIGLSTGVVILLISGGKSSHLLVFSEDLFFIYLLPPIIFNAGFQVKKKQFFRNFITIIMFGAIGTLISFTIISLGAMTIFKEMDIGSLELGDYLAIGAIFAATDSVCTLQVLNQDETPLLYSLVFGEGVVNDATSVVLFNAIQSFDLTHIDHRIALQFSGNFLYLFFASTLLGAMTGLLSAYIIKKLYFGRHSTDREVALMMLMAYLSYMLAELFYLSGILTVFFCGIVMSHYTWHNVTESSRVTTKHAFATLSFVAEIFLFLYVGMDALDIEKWRFVSDSPGTSIAVSSILIGLVMVGRAAFVFPLSLLMNLSKKSHSEKVTFNQQVVIWWAGLMRGAVSM…
>BvNHX2
MVLDLGVQIANMGESGHAQVVPIAVFVAVLCFCMVIGHLLEENRWVNESITAILIGCLTGMIILLISKGKNSHIVRFDEELFFIYLLPPIIFNAGFQVKKKQFFQNFLTIMLFGVIGVFISTTIISTGSWWLFPKVGFAGLTARDYLAIGTIFSSTDTVCTLQILNQDETPFLYSLVFGEGVVNDATSVVLFNAIQKLNVKSFGDWTHVIGDFLYLFFASTALGITTGLLTAYALKALYFGRHSTDREIALMTLMAYLSYMLAELSQLSGILTVFFCGIVMSHYAWHNITENSRITTRHIFATMSFIAETFIFLYVGTDVFDMEKWKMTKMGFGTLVGIYTTVVFLILLGRAAFVFPLSAISNRMNREKENSGRRSTITFRKQVIIWWAGLMRGAVSIA…
>BvNHX3
MFGVPNIVHESSPFDTSTVISITVFISLICLCIIVGHLLEENRWANESITSLLLGVVSGAVVLLIRRGQNSRILVFNEELFFIYLLPPIIFNAGFQVKKKQFFKNFSTILSFGVLGTLISFCLVSSGVLLLLKKIGLTQLSVNDYMALGAILSATDSVCTLQVLNQDETPLLYSVVFGEGVVNDATSIVLFNAVQKLDLSNLSAMTALALLGTFLYLLVTSTLLGIFAGLLSAFVIKKLYIGRHSTDREIALMMLMAYLSYMIAELMELSGILTVFFCGVVMSHYTWHNVSESSRITSKHAFATMSFISETFIFLYVGMDTLDIDKWKESSTSAGTYLAVSTTMLALVLIGRAAFVFPLASILNYTRRGNDQKIDLSRQFIVWWAGLMRGAVTVALSYN…
>BvNHX4
MSPTNDPLISPVDVRGSPAKEQQAAGVGILLQIMMLVLSFVLGHVLRRHKFYYLPEASASLLIGLVVGGLANISNTETSIREWFNFHEEFFFLFLLPPIIFQSGFILAPKPFFSNFGAIVTFSVVGTFISSILTGLLVYLGGVTYLIYKLPFVECMMFGALISSTDPITVLAIFQELGTDVNLYALVFGESVLNDAVAISLYRSMSLLRGQSSSQNIFKFILGFLETFVGSLSSGVGVGFISALLFKYAGLDIENLQNLECCLFVLFPYFSYMLAEGLGLSGIVSILFTGIVMKHYTYSNLSEKSQQFVSEFFHLISSLAETFIFIYMGLDIVMERHSWSHIGFIFFSIVIIVIARGVNVFSCGYLVNLARPANRKIPMTHQKALWYNGLRGAMAFALA…
>BvNHX5
MAAYRIAVPLPFMLAEAETVTTNTTNSAVVAALVEEESNPTDAVIFFGVSLILGIACRHFLRGTRIPYTVALLVIGIGLGSLEYGTKHGVGRFGDGIRIWENIDPDLLLAVFLPALLFESSFSMEVHQIKRCIAQMVLLAGPGVLISTFALGAALKLSFPYDWNWKTSLLLGGLLSATDPVAVVALLKELGASKKLSTIIEGESLMNDGTAIVVYQLFFQMVLGRTFNWASIVKFLVQVALGAVGMGIAFGAASVLWLGFIFNDTVIEITLTLAVSYVAYFTAQEGAAVSGVLTVMTLGMFYAAAARTAFKGESQQSLHHFWEMVAYIANTLIFILSGTVIAQGVLSSDSIFQNHGITWGYLILLYVYVLVARGLVVGALFPFLRYFGYGLDWKEAIIL…

## Sheet: Sheet2
Sequence Definition	Sense Primer	Anti-sense Primer
LjNHX1	CACTTGTAAGGTTGCTGATG	ATCGGCTGTGTTGGATTC
LjNHX2	TCAAGAATCACTACCAAGCA	GGCGTCCATACCAACATAT
LjNHX3	GTCTAATGAGAGGTGCTGTAT	CTGTAATCGTGCTGGTGAT
LjNHX4	AAGGAGTAGTGAATGATGCT	AGTGAAGAAGAGGTAGAGGA
LjNHX5	AGAGGTCGCCATTATGATAC	TATGCCAGGTGTAGTGAGA
LjNHX6	AAGTAGAGGAAGAGGAGAGT	AAGCAACGGTGTAAGGAA
LjNHX7	TGTGGTGTTCTTATGTCTCA	GTCCAGAGCATCCATTCC

## Sheet: Sheet3
Seq_1	Seq_2	Ka	Ks	Ka_Ks	EffectiveLen	AverageS-sites	AverageN-sites	cN	cS	pN	pS	Note
LjNHX2	LjNHX5	0.0643781	0.657838	0.0978632	1470	354.25	1115.75	68.8333	155.167	0.0616924	0.438015

## Sheet: Sheet4
motif1
	>Ljap00015571_site_1 offset= 152
	GAIFSATDSVCTLQVLNQDETPLLYSLVFGEGVVNDATSVVLFNAVQSFD
	>Ljap00014455_site_1 offset= 141
	GAIFSATDSVCTLQVLNQDETPLLYSLVFGEGVVNDATSVVLFNAVQSFD
	>Ljap00006626_site_1 offset= 153
	GAIFAATDSVCTLQVLNQDETPLLYSLVFGEGVVNDATSVVLFNAVQSFD
	>Ljap00034208_site_1 offset= 153
	GAIFSATDSVCTLQVLNQEETPLLYSLVFGEGVVNDATSIVLFNAIQKFD
	>Ljap00009930_site_1 offset= 134
	GTIFSSTDTVCTLQVLHQDETPLLYSLVFGEGVVNDATSVVLFNAVQKID
	>Ljap00011905_site_1 offset= 10
	GAILSATDSVCTLQVLNQEETPFLYSVVFGEGVVNDATSIVLFNAVQSLD
mitif2
	>Ljap00006626_site_1 offset= 282
	CGIVMSHYTWHNVTESSRITTKHAFATLSFVAETFIFLYVGMDALDIEKW
	>Ljap00014455_site_1 offset= 270
	CGIVMSHYTWHNVTESSRITTKHAFATLSFVAEIFIFLYVGMDALDIEKW
	>Ljap00015571_site_1 offset= 281
	CGIVMSHYTWHNVTESSRITTKHTFATLSFVAEIFIFLYVGMDALDIEKW
	>Ljap00011905_site_1 offset= 139
	CGIVMSHYTWHNVTESSRITTRHAFATISFIAETFIFLYVGMDALDIDKW
	>Ljap00009930_site_1 offset= 280
	CGVLMSHYAWHNVTESSRITTRHVFAMMSFIAETFIFLYVGMDALDIEKW
	>Ljap00034208_site_1 offset= 255
	ALMILMAYLSYVMAEASSLTLKHAFATLSFVAEVFIFLYVGMDALDIEKW
motif3
	>Ljap00014455_site_1 offset= 475
	PRPTSLRMLLTTPSHTVHHYWRKFDNAFMRPVFGGRGFVPF
	>Ljap00015571_site_1 offset= 447
	PSPPSLRMLLSTPSHTVHHYWRKFDNAFMRPVFGGRGFVPY
	>Ljap00006626_site_1 offset= 483
	SRPTSLRLLLTTPTHTVHRYWRKFDNTFMRPVFGGRGFVPY
	>Ljap00034208_site_1 offset= 459
	PRHNNLHMLLCTPSHTVHRYWRKFDDGFMRPVFGGRGFVQT
	>Ljap00011905_site_1 offset= 319
	GPTSSFRLLIKYPTYTAHQLWRKFDDKFMRPVFGGRGFVPY
	>Ljap00009930_site_1 offset= 481
	RAKDNLSMLMERPVYTIHYYWKRFDNAYMKPIFGGPICEIS
motif4
	>Ljap00014455_site_1 offset= 60
	GTSSHLLVFSEDLFFIYLLPPIIFNAGFQVKKKQFFRNFMT
	>Ljap00015571_site_1 offset= 71
	GKSSHLLVFSEDLFFIYLLPPIIFNAGFQVKKKQFFRNFTT
	>Ljap00006626_site_1 offset= 72
	GKSSHVLVFSEDLFFIYLLPPIIFNAGFQVKKKHFFRNFIT
	>Ljap00009930_site_1 offset= 73
	GKSSHILRFDEQLFFIYLLPPIIFNAGFQVKKKQFFHNFLT
	>Ljap00034208_site_1 offset= 72
	GTSSRILEFNEEFFFIYLLPPIIFNAGFQVKKKQFFRNFMT
	>Ljap00035581_site_1 offset= 62
	GLGSLGANIDPDLLLAVFLPALLFESSFSMEVHQIKIQFLL
motif5
	>Ljap00014455_site_1 offset= 229
	KKLYFGRHSTDREVAIMMLMAYLSYMLAE
	>Ljap00011905_site_1 offset= 98
	KTLYFGRHSTDREVAIMMLMAYLSYMVAE
	>Ljap00006626_site_1 offset= 241
	KTLYFGRHSTDREVALMMLMAYLSYMLAE
	>Ljap00015571_site_1 offset= 240
	KKLCFGRHSTDREVAIMILMAYLSYMLAE
	>Ljap00009930_site_1 offset= 239
	RGLYFGRHSTVREISLMVLIAYLSYMLAE
	>Ljap00034208_site_1 offset= 217
	NFLSLFITSTLLGVAVGLLSAYIVKKLYF
motif6
	>Ljap00015571_site_1 offset= 26
	NLFVALLCACIVIGHLLEENRWMNESITA
	>Ljap00014455_site_1 offset= 15
	NLFVALLCACIVIGHLLEENRWMNESITA
	>Ljap00034208_site_1 offset= 27
	TLFVALLCACIVIGHLLEENRWMNESITA
	>Ljap00006626_site_1 offset= 27
	NLFVALLCTCIVIGHLLEENRWMNESITA
	>Ljap00009930_site_1 offset= 28
	TVFVAVLCLCLVIGHLLEENRWVNESITA
	>Ljap00035581_site_1 offset= 625
	YICAAFLRAHRIARQQLHDFIGDSEVSSL
motif7
	>Ljap00015571_site_1 offset= 374
	GNAIMITSTITVVLFSTVVFGLLTKPIVR
	>Ljap00014455_site_1 offset= 403
	GNAFMITSTITVVLFSTVVFGLLTKPLVR
	>Ljap00006626_site_1 offset= 415
	GNAIMITSTITVVLFSTVVFGLMTQPLIR
	>Ljap00034208_site_1 offset= 383
	GHAIMITSTITVVLFSTMVFGSMTKPLVR
	>Ljap00009930_site_1 offset= 415
	VNAMMITTTIIIVLFSTIVFGFLTKPLVR
	>Ljap00011905_site_1 offset= 250
	DNALLITCTIIVVLFSTMVFGSVTKPLIN
motif8
	>Ljap00034208_site_1 offset= 344
	DKIEFKQQVTIWWAGLMRGAVSIALAYNQFTKAGHTQ
	>Ljap00014455_site_1 offset= 364
	DKIEFKQQITIWWAGLMRGAVSMALAYNQFTRLGHTQ
	>Ljap00006626_site_1 offset= 376
	ERISIRQQVIIWWAGLMRGAVSMALAYNKFTSAGHTH
	>Ljap00015571_site_1 offset= 335
	DSPGTSIGVTIWWAGLMRGAVSMALAYNQFTRSGHTQ
	>Ljap00009930_site_1 offset= 376
	PLLTFKHQVVIWWAGLMRGAVSIGLAFKQFTHSGVTL
	>Ljap00011905_site_1 offset= 212
	GRAAFIYPLATLSNCLKRRDSDKIVFRKQFSASGDSS
motif9
	>Ljap00034208_site_1 offset= 432
	PKSITLPLLSNGQDSESN
	>Ljap00014455_site_1 offset= 451
	PKSYAVPLLSNGQDSEAE
	>Ljap00015571_site_1 offset= 422
	PKSFTVPLLTGGQDSEAN
	>Ljap00006626_site_1 offset= 460
	PKSHTVSLLGHPQDSELD
	>Ljap00009930_site_1 offset= 461
	KEDMTLPLLSFDETAETN
	>Ljap00035581_site_1 offset= 1015
	PEGLYLSGLFHEHPKETD
	>Ljap00011905_site_1 offset= 297
	LEDLRLSFLENGGASEPR
motif10
	>Ljap00006626_site_1 offset= 211
	ALHFVGNFLYLFITSTMLG
	>Ljap00014455_site_1 offset= 199
	CLQLVGNFLYLFVTSTLLG
	>Ljap00015571_site_1 offset= 210
	AFKLLGNFIYLFIMSTLLG
	>Ljap00011905_site_1 offset= 68
	ALKLLWTFLYLFFTSTFLG
	>Ljap00009930_site_1 offset= 192
	ALHVLLDFLYLFSTSTALG
	>Ljap00035581_site_1 offset= 153
	AIKLIFPYGWNWKTSLLLG
motif11
	>Ljap00015571_site_1 offset= 112
	ITLFGAVGTLISFII
	>Ljap00014455_site_1 offset= 101
	ITLFGAVGTLISFII
	>Ljap00006626_site_1 offset= 113
	IMLFGAVGTLISCVV
	>Ljap00034208_site_1 offset= 113
	IMLFGAIGTLISFGI
	>Ljap00009930_site_1 offset= 114
	IMLFGVVGVFISTAI
	>Ljap00035581_site_1 offset= 135
	MLLLAGPGVLISTFC
motif12
	>Ljap00014455_site_1 offset= 120
	AINIFKKMNIGSLEIADFLAI
	>Ljap00015571_site_1 offset= 131
	AINFFKKMNIGSLEIGDFLAI
	>Ljap00006626_site_1 offset= 132
	ATEIFKKMDVGSLDVGDFLAI
	>Ljap00034208_site_1 offset= 132
	ATQLFKTLDVGFLELRDYLAI
	>Ljap00035581_site_1 offset= 873
	LPQIFEKMSIQDLRVVAQRSV
	>Ljap00009930_site_1 offset= 333
	KLSVWDSMGIYGAVIFLILLG
